# Supplementary material for: Replication collisions induced by de-repressed S-phase transcription are connected with malignant transformation of adult stem cells
Source: Springer Nature journal article supplement (doi:10.1038/s41467-022-34577-y), 2022-11-14
Supplement: MOESM3 [file 41467_2022_34577_MOESM3_ESM.pdf]

## **Description of Additional Supplementary Files**

File Name: Supplementary Data 1

Description: Primers for genotyping ,RT-qPCR,copy number variation assay and DNA methylation assay.

File Name: Supplementary Data 2

Description: Clinical Data of Cancer Patients Related to Supplementary Figure 8.

File Name: Supplementary Data 3

Description: Probes and genomic locations for 450K methylation array shown in Supplementary Figure 8c.
