# Supplementary material for: Replication collisions induced by de-repressed S-phase transcription are connected with malignant transformation of adult stem cells
Source: Nat Commun. 2022 Nov 14;13:6907. doi: 10.1038/s41467-022-34577-y (PMC9663592; doi:10.1038/s41467-022-34577-y)
Supplement: Supplementary file 4 — Supplementary Data 1 [file 41467_2022_34577_MOESM4_ESM.xlsx]

## Sheet: Supplementary Data 1
Supplementary Data 1: Primers for genotyping ,RT-qPCR,copy number variation assay and DNA methylation assay.
Name	Primer sequence (5'-->3')	Application
m36b4	F-AAGGTGAAGCTGAAAGAACAG	qRT
	R-ATGGACGACAGGTGGGTACTG
Gapdh	F- GTGAAGGTCGGTGTGAACG	qRT
	R- ATTTGATGTTAGTGGGGTCTCG
Suv4-20h1	F-TCATGGTAACTCGGGATTTGA	qRT
	R-AGGAAAGGCGCTAGTGTTCA
p53	F-GTTCCGAGAGCTGAATGAGG	qRT
	R-TTATGGCGGGAGGTAGACTG
p21	F-GTCCAATCCTGGTGATGTCC	qRT
	R- GTTTTCGGCCCTGAGATGT
hACTB	F-CACCATTGGCAATGAGCGGTTC	qRT
	R-AGGTCTTTGCGGATGTCCACGT
hKMT5A	F-GATCACCGACGCCAAGAAAC	qRT
	R-TCTAGTTGCATCCACGCAGTAG
hKMT5B	F-AGGCTGGCAAAAATGCAGTC	qRT
	R-AGCGACTCTGTCCTTCAAATCC
hPVRL1	F-TGACCACTTGCTGCCATCCTCCT	CNV
	R-AGCGGGTTGGCAAAGCTGC
hKMT5B	F-ATGGTGGTGAATGGCAGGAG	CNV
	R-TGTTCGACCTCCTCTCGACT
hKMT5B promoter	F-gctctaatcccggcttgtgt	Methylation
	R-caacggctgtgtgtgtgaag
Suv4-20h1LoxP2	F-CCACCTTTCATCTACCG	Genotyping
	R-GGAGAAGAATGGCCTG
Pax7CE	F-ACTAGGCTCCACTCTGTCCTTC	Genotyping
	R-GCAGATGTAGGGACATTCCAGTG
p53 flox	F- CACAAAAACAGGTTAAACCCAG	Genotyping
	R- AGCACATAGGAGGCAGAGAC
hKMT5B-HA BamHI-F	F-TAATGGATCCGAGGAGAGCCACCATGTACCCATACGATGTTCCAGATTACGCTaagtggttgggagaatcc	Cloning
hKMT5B-V5 XhoI-R	R-CCTACTCGAGTTACGTAGAGTCGAGACCGAGGAGAGGGTTAGGGATAGGCTTACCGGCATTAAGCCTTAAAGAC
mRnaseh1 BamHI-F	F-TAATGGATCCGAGGAGAGCCACCATGCGCTGGCTGCTGCCG	Cloning
mRnaseh1-HA XhoI-R	R-CCTACTCGAGTTAAGCGTAATCTGGAACATCGTATGGGTAGTCCTCAGACTGCTTCGCTC
hKMT5B_a751g_g752c_S251A_F	F-ccttgtggagtacatgacagcgaagtcgttttctccatgt	Mutagenesis
hKMT5B_a751g_g752c_S251A_R	R-acatggagaaaacgacttcgctgtcatgtactccacaagg
qRT: Real-Time Quantitative Reverse Transcription PCR; F: Forward primer; R: Reverse primer
