# Supplementary material for: Replication collisions induced by de-repressed S-phase transcription are connected with malignant transformation of adult stem cells
Source: Nat Commun. 2022 Nov 14;13:6907. doi: 10.1038/s41467-022-34577-y (PMC9663592; doi:10.1038/s41467-022-34577-y)
Supplement: Supplementary file 5 — Supplementary Data 2 [file 41467_2022_34577_MOESM5_ESM.xlsx]

## Sheet: Supplementary Data 2
Supplementary Data 2: Clinical Data of Cancer Patients Related to Supplementary Figure 8
sample	cancer type abbreviation	gender	age_at_initial_pathologic_diagnosis	sample_type
TCGA-ND-A4WA-01	UCS	FEMALE	90	Primary Tumor
TCGA-NF-A5CP-01	UCS	FEMALE	90	Primary Tumor
TCGA-N8-A4PP-01	UCS	FEMALE	88	Primary Tumor
TCGA-N7-A4Y5-01	UCS	FEMALE	87	Primary Tumor
TCGA-N6-A4VE-01	UCS	FEMALE	84	Primary Tumor
TCGA-N6-A4VC-01	UCS	FEMALE	83	Primary Tumor
TCGA-ND-A4WC-01	UCS	FEMALE	83	Primary Tumor
TCGA-N8-A4PL-01	UCS	FEMALE	82	Primary Tumor
TCGA-N6-A4VD-01	UCS	FEMALE	81	Primary Tumor
TCGA-NA-A5I1-01	UCS	FEMALE	80	Primary Tumor
TCGA-NA-A4R0-01	UCS	FEMALE	80	Primary Tumor
TCGA-N9-A4PZ-01	UCS	FEMALE	77	Primary Tumor
TCGA-ND-A4WF-01	UCS	FEMALE	77	Primary Tumor
TCGA-N6-A4VG-01	UCS	FEMALE	77	Primary Tumor
TCGA-N8-A4PQ-01	UCS	FEMALE	76	Primary Tumor
TCGA-NA-A4R1-01	UCS	FEMALE	75	Primary Tumor
TCGA-N8-A56S-01	UCS	FEMALE	75	Primary Tumor
TCGA-NG-A4VW-01	UCS	FEMALE	74	Primary Tumor
TCGA-N8-A4PM-01	UCS	FEMALE	73	Primary Tumor
TCGA-NA-A4QV-01	UCS	FEMALE	72	Primary Tumor
TCGA-N7-A4Y8-01	UCS	FEMALE	72	Primary Tumor
TCGA-N5-A4RN-01	UCS	FEMALE	71	Primary Tumor
TCGA-N8-A4PI-01	UCS	FEMALE	71	Primary Tumor
TCGA-N9-A4Q1-01	UCS	FEMALE	70	Primary Tumor
TCGA-N5-A4RD-01	UCS	FEMALE	69	Primary Tumor
TCGA-N7-A59B-01	UCS	FEMALE	69	Primary Tumor
TCGA-N5-A4RT-01	UCS	FEMALE	69	Primary Tumor
TCGA-N9-A4Q7-01	UCS	FEMALE	69	Primary Tumor
TCGA-N9-A4Q8-01	UCS	FEMALE	68	Primary Tumor
TCGA-N5-A4RF-01	UCS	FEMALE	68	Primary Tumor
TCGA-N8-A4PN-01	UCS	FEMALE	68	Primary Tumor
TCGA-N5-A4RO-01	UCS	FEMALE	67	Primary Tumor
TCGA-QM-A5NM-01	UCS	FEMALE	67	Primary Tumor
TCGA-ND-A4W6-01	UCS	FEMALE	67	Primary Tumor
TCGA-N8-A4PO-01	UCS	FEMALE	66	Primary Tumor
TCGA-N5-A4R8-01	UCS	FEMALE	65	Primary Tumor
TCGA-N5-A59F-01	UCS	FEMALE	65	Primary Tumor
TCGA-N7-A4Y0-01	UCS	FEMALE	65	Primary Tumor
TCGA-N9-A4Q3-01	UCS	FEMALE	65	Primary Tumor
TCGA-N5-A4RS-01	UCS	FEMALE	65	Primary Tumor
TCGA-N5-A4RA-01	UCS	FEMALE	63	Primary Tumor
TCGA-NG-A4VU-01	UCS	FEMALE	63	Primary Tumor
TCGA-N5-A59E-01	UCS	FEMALE	62	Primary Tumor
TCGA-N5-A4RM-01	UCS	FEMALE	62	Primary Tumor
TCGA-N5-A4RV-01	UCS	FEMALE	62	Primary Tumor
TCGA-NA-A4QY-01	UCS	FEMALE	62	Primary Tumor
TCGA-NF-A4WX-01	UCS	FEMALE	61	Primary Tumor
TCGA-N5-A4RJ-01	UCS	FEMALE	61	Primary Tumor
TCGA-N9-A4Q4-01	UCS	FEMALE	61	Primary Tumor
TCGA-NA-A4QW-01	UCS	FEMALE	61	Primary Tumor
TCGA-NA-A4QX-01	UCS	FEMALE	60	Primary Tumor
TCGA-N6-A4V9-01	UCS	FEMALE	59	Primary Tumor
TCGA-NF-A4X2-01	UCS	FEMALE	59	Primary Tumor
TCGA-NF-A4WU-01	UCS	FEMALE	59	Primary Tumor
TCGA-QN-A5NN-01	UCS	FEMALE	55	Primary Tumor
TCGA-N5-A4RU-01	UCS	FEMALE	54	Primary Tumor
TCGA-N6-A4VF-01	UCS	FEMALE	51	Primary Tumor
TCGA-IM-A3U2-01	THCA	FEMALE	89	Primary Tumor
TCGA-EL-A3CW-01	THCA	FEMALE	87	Primary Tumor
TCGA-EM-A3AQ-01	THCA	FEMALE	85	Primary Tumor
TCGA-EM-A3O3-01	THCA	FEMALE	83	Primary Tumor
TCGA-ET-A39I-01	THCA	FEMALE	83	Primary Tumor
TCGA-BJ-A28V-01	THCA	FEMALE	80	Primary Tumor
TCGA-DE-A4MB-01	THCA	FEMALE	79	Primary Tumor
TCGA-EL-A3ZO-01	THCA	FEMALE	79	Primary Tumor
TCGA-EL-A3ZQ-01	THCA	FEMALE	78	Primary Tumor
TCGA-EL-A3CT-01	THCA	FEMALE	78	Primary Tumor
TCGA-EL-A3CR-01	THCA	FEMALE	78	Primary Tumor
TCGA-EM-A2CO-01	THCA	FEMALE	77	Primary Tumor
TCGA-DJ-A3V5-01	THCA	FEMALE	76	Primary Tumor
TCGA-E8-A418-01	THCA	FEMALE	75	Primary Tumor
TCGA-EM-A1YA-01	THCA	FEMALE	74	Primary Tumor
TCGA-4C-A93U-01	THCA	FEMALE	74	Primary Tumor
TCGA-ET-A39P-01	THCA	FEMALE	73	Primary Tumor
TCGA-EM-A1YB-01	THCA	FEMALE	73	Primary Tumor
TCGA-EL-A3GU-01	THCA	FEMALE	72	Primary Tumor
TCGA-ET-A2MY-01	THCA	FEMALE	72	Primary Tumor
TCGA-EL-A3GQ-01	THCA	FEMALE	72	Primary Tumor
TCGA-EM-A3FP-01	THCA	FEMALE	71	Primary Tumor
TCGA-EM-A1YC-01	THCA	FEMALE	71	Primary Tumor
TCGA-DJ-A2PT-01	THCA	FEMALE	70	Primary Tumor
TCGA-DJ-A3UZ-01	THCA	FEMALE	70	Primary Tumor
TCGA-EL-A3CU-01	THCA	FEMALE	70	Primary Tumor
TCGA-DJ-A2QC-01	THCA	FEMALE	70	Primary Tumor
TCGA-DJ-A2PN-01	THCA	FEMALE	70	Primary Tumor
TCGA-EL-A3CL-01	THCA	FEMALE	70	Primary Tumor
TCGA-EL-A3T9-01	THCA	FEMALE	69	Primary Tumor
TCGA-BJ-A3PR-01	THCA	FEMALE	69	Primary Tumor
TCGA-EM-A22N-01	THCA	FEMALE	68	Primary Tumor
TCGA-J8-A4HY-01	THCA	FEMALE	68	Primary Tumor
TCGA-DJ-A4UL-01	THCA	FEMALE	68	Primary Tumor
TCGA-ET-A3DV-01	THCA	FEMALE	68	Primary Tumor
TCGA-EL-A4K1-01	THCA	FEMALE	68	Primary Tumor
TCGA-DJ-A3VM-01	THCA	FEMALE	68	Primary Tumor
TCGA-EM-A3AI-01	THCA	FEMALE	67	Primary Tumor
TCGA-BJ-A0ZA-01	THCA	FEMALE	67	Primary Tumor
TCGA-EL-A3MX-01	THCA	FEMALE	66	Primary Tumor
TCGA-FY-A3R9-01	THCA	FEMALE	66	Primary Tumor
TCGA-EL-A3H1-01	THCA	FEMALE	66	Primary Tumor
TCGA-FY-A3W9-01	THCA	FEMALE	66	Primary Tumor
TCGA-DJ-A2Q9-01	THCA	FEMALE	65	Primary Tumor
TCGA-EL-A3GV-01	THCA	FEMALE	65	Primary Tumor
TCGA-DE-A0XZ-01	THCA	FEMALE	65	Primary Tumor
TCGA-FY-A3I5-01	THCA	FEMALE	64	Primary Tumor
TCGA-EL-A3CM-01	THCA	FEMALE	64	Primary Tumor
TCGA-EM-A4FV-01	THCA	FEMALE	64	Primary Tumor
TCGA-FY-A3YR-01	THCA	FEMALE	64	Primary Tumor
TCGA-EM-A2OV-01	THCA	FEMALE	64	Primary Tumor
TCGA-BJ-A3F0-01	THCA	FEMALE	64	Primary Tumor
TCGA-DJ-A1QI-01	THCA	FEMALE	63	Primary Tumor
TCGA-BJ-A0ZE-01	THCA	FEMALE	63	Primary Tumor
TCGA-EM-A3FL-01	THCA	FEMALE	63	Primary Tumor
TCGA-EM-A2CM-01	THCA	FEMALE	62	Primary Tumor
TCGA-DJ-A1QE-01	THCA	FEMALE	62	Primary Tumor
TCGA-FY-A3R8-01	THCA	FEMALE	62	Primary Tumor
TCGA-EM-A3ST-01	THCA	FEMALE	62	Primary Tumor
TCGA-EM-A3AK-01	THCA	FEMALE	62	Primary Tumor
TCGA-EL-A3CS-01	THCA	FEMALE	62	Primary Tumor
TCGA-FY-A4B4-01	THCA	FEMALE	62	Primary Tumor
TCGA-FK-A3SD-01	THCA	FEMALE	61	Primary Tumor
TCGA-DJ-A2Q3-01	THCA	FEMALE	61	Primary Tumor
TCGA-DJ-A1QF-01	THCA	FEMALE	61	Primary Tumor
TCGA-FY-A3TY-01	THCA	FEMALE	61	Primary Tumor
TCGA-FE-A22Z-01	THCA	FEMALE	61	Primary Tumor
TCGA-FY-A2QD-01	THCA	FEMALE	61	Primary Tumor
TCGA-DE-A4M8-01	THCA	FEMALE	61	Primary Tumor
TCGA-KS-A4I7-01	THCA	FEMALE	61	Primary Tumor
TCGA-ET-A3BT-01	THCA	FEMALE	60	Primary Tumor
TCGA-DJ-A3V4-01	THCA	FEMALE	60	Primary Tumor
TCGA-DE-A0Y3-01	THCA	FEMALE	60	Primary Tumor
TCGA-DJ-A3VF-01	THCA	FEMALE	60	Primary Tumor
TCGA-J8-A4HW-01	THCA	FEMALE	59	Primary Tumor
TCGA-EM-A4FM-01	THCA	FEMALE	59	Primary Tumor
TCGA-BJ-A45F-01	THCA	FEMALE	59	Primary Tumor
TCGA-DJ-A1QH-01	THCA	FEMALE	58	Primary Tumor
TCGA-L6-A4EU-01	THCA	FEMALE	58	Primary Tumor
TCGA-IM-A3ED-01	THCA	FEMALE	58	Primary Tumor
TCGA-DE-A69K-01	THCA	FEMALE	58	Primary Tumor
TCGA-EL-A3H5-01	THCA	FEMALE	57	Primary Tumor
TCGA-E8-A437-01	THCA	FEMALE	57	Primary Tumor
TCGA-FY-A3R6-01	THCA	FEMALE	57	Primary Tumor
TCGA-DJ-A3V3-01	THCA	FEMALE	57	Primary Tumor
TCGA-BJ-A0Z9-01	THCA	FEMALE	57	Primary Tumor
TCGA-E8-A3X7-01	THCA	FEMALE	57	Primary Tumor
TCGA-DJ-A2Q2-01	THCA	FEMALE	57	Primary Tumor
TCGA-DJ-A2Q0-01	THCA	FEMALE	57	Primary Tumor
TCGA-E8-A432-01	THCA	FEMALE	57	Primary Tumor
TCGA-E8-A242-01	THCA	FEMALE	56	Primary Tumor
TCGA-E8-A434-01	THCA	FEMALE	56	Primary Tumor
TCGA-DJ-A2QA-01	THCA	FEMALE	56	Primary Tumor
TCGA-EM-A22J-01	THCA	FEMALE	56	Primary Tumor
TCGA-BJ-A291-01	THCA	FEMALE	56	Primary Tumor
TCGA-ET-A25G-01	THCA	FEMALE	56	Primary Tumor
TCGA-FY-A40L-01	THCA	FEMALE	55	Primary Tumor
TCGA-EL-A3MW-01	THCA	FEMALE	55	Primary Tumor
TCGA-FY-A40N-01	THCA	FEMALE	55	Primary Tumor
TCGA-ET-A39T-01	THCA	FEMALE	55	Primary Tumor
TCGA-EM-A3OA-01	THCA	FEMALE	55	Primary Tumor
TCGA-KS-A4ID-01	THCA	FEMALE	55	Primary Tumor
TCGA-IM-A3U3-01	THCA	FEMALE	55	Primary Tumor
TCGA-DJ-A2PX-01	THCA	FEMALE	55	Primary Tumor
TCGA-EM-A3FR-01	THCA	FEMALE	55	Primary Tumor
TCGA-EL-A4JZ-01	THCA	FEMALE	55	Primary Tumor
TCGA-E3-A3DZ-01	THCA	FEMALE	55	Primary Tumor
TCGA-EL-A3T2-01	THCA	FEMALE	55	Primary Tumor
TCGA-EM-A1CS-01	THCA	FEMALE	55	Primary Tumor
TCGA-BJ-A0ZF-01	THCA	FEMALE	54	Primary Tumor
TCGA-BJ-A192-01	THCA	FEMALE	54	Primary Tumor
TCGA-H2-A26U-01	THCA	FEMALE	54	Primary Tumor
TCGA-J8-A3YG-01	THCA	FEMALE	54	Primary Tumor
TCGA-EL-A4K0-01	THCA	FEMALE	54	Primary Tumor
TCGA-EM-A3O6-01	THCA	FEMALE	54	Primary Tumor
TCGA-EM-A1YD-01	THCA	FEMALE	53	Primary Tumor
TCGA-E8-A436-01	THCA	FEMALE	53	Primary Tumor
TCGA-EL-A3N3-01	THCA	FEMALE	53	Primary Tumor
TCGA-DJ-A2QB-01	THCA	FEMALE	53	Primary Tumor
TCGA-DJ-A2PV-01	THCA	FEMALE	53	Primary Tumor
TCGA-ET-A2N4-01	THCA	FEMALE	53	Primary Tumor
TCGA-FY-A3WA-01	THCA	FEMALE	52	Primary Tumor
TCGA-EM-A22I-01	THCA	FEMALE	52	Primary Tumor
TCGA-DJ-A2PU-01	THCA	FEMALE	52	Primary Tumor
TCGA-BJ-A0ZH-01	THCA	FEMALE	52	Primary Tumor
TCGA-J8-A3NZ-01	THCA	FEMALE	52	Primary Tumor
TCGA-E8-A2EA-01	THCA	FEMALE	52	Primary Tumor
TCGA-DJ-A3VI-01	THCA	FEMALE	52	Primary Tumor
TCGA-DE-A4MA-01	THCA	FEMALE	52	Primary Tumor
TCGA-ET-A25L-01	THCA	FEMALE	52	Primary Tumor
TCGA-DJ-A2Q7-01	THCA	FEMALE	52	Primary Tumor
TCGA-DJ-A13P-01	THCA	FEMALE	52	Primary Tumor
TCGA-EM-A2CS-01	THCA	FEMALE	51	Primary Tumor
TCGA-ET-A25R-01	THCA	FEMALE	51	Primary Tumor
TCGA-DJ-A13X-01	THCA	FEMALE	51	Primary Tumor
TCGA-BJ-A45I-01	THCA	FEMALE	51	Primary Tumor
TCGA-ET-A4KN-01	THCA	FEMALE	51	Primary Tumor
TCGA-CE-A3ME-01	THCA	FEMALE	51	Primary Tumor
TCGA-E8-A416-01	THCA	FEMALE	51	Primary Tumor
TCGA-ET-A2N0-01	THCA	FEMALE	51	Primary Tumor
TCGA-FY-A40M-01	THCA	FEMALE	51	Primary Tumor
TCGA-BJ-A3PT-01	THCA	FEMALE	51	Primary Tumor
TCGA-DJ-A3UR-01	THCA	FEMALE	51	Primary Tumor
TCGA-DJ-A3UN-01	THCA	FEMALE	51	Primary Tumor
TCGA-EL-A3D6-01	THCA	FEMALE	51	Primary Tumor
TCGA-BJ-A4O9-01	THCA	FEMALE	51	Primary Tumor
TCGA-FK-A3SH-01	THCA	FEMALE	50	Primary Tumor
TCGA-E8-A44K-01	THCA	FEMALE	50	Primary Tumor
TCGA-DJ-A3UW-01	THCA	FEMALE	50	Primary Tumor
TCGA-DJ-A3V9-01	THCA	FEMALE	50	Primary Tumor
TCGA-EL-A3CP-01	THCA	FEMALE	50	Primary Tumor
TCGA-FY-A3R7-01	THCA	FEMALE	50	Primary Tumor
TCGA-QD-A8IV-01	THCA	FEMALE	50	Primary Tumor
TCGA-KS-A4I5-01	THCA	FEMALE	49	Primary Tumor
TCGA-BJ-A191-01	THCA	FEMALE	49	Primary Tumor
TCGA-E3-A3E3-01	THCA	FEMALE	49	Primary Tumor
TCGA-DJ-A3UU-01	THCA	FEMALE	49	Primary Tumor
TCGA-L6-A4ET-01	THCA	FEMALE	49	Primary Tumor
TCGA-EM-A4FN-01	THCA	FEMALE	49	Primary Tumor
TCGA-EM-A2CJ-01	THCA	FEMALE	49	Primary Tumor
TCGA-DE-A3KN-01	THCA	FEMALE	49	Primary Tumor
TCGA-FY-A3NM-01	THCA	FEMALE	48	Primary Tumor
TCGA-DJ-A4V4-01	THCA	FEMALE	48	Primary Tumor
TCGA-FY-A3NN-01	THCA	FEMALE	48	Primary Tumor
TCGA-BJ-A45G-01	THCA	FEMALE	48	Primary Tumor
TCGA-ET-A39K-01	THCA	FEMALE	48	Primary Tumor
TCGA-EL-A3TB-01	THCA	FEMALE	47	Primary Tumor
TCGA-EM-A2P3-01	THCA	FEMALE	47	Primary Tumor
TCGA-EL-A3T7-01	THCA	FEMALE	47	Primary Tumor
TCGA-ET-A2N1-01	THCA	FEMALE	47	Primary Tumor
TCGA-EL-A3CN-01	THCA	FEMALE	47	Primary Tumor
TCGA-J8-A3YD-01	THCA	FEMALE	47	Primary Tumor
TCGA-EM-A2CU-01	THCA	FEMALE	47	Primary Tumor
TCGA-DJ-A2Q8-01	THCA	FEMALE	47	Primary Tumor
TCGA-ET-A3BV-01	THCA	FEMALE	47	Primary Tumor
TCGA-KS-A41I-01	THCA	FEMALE	47	Primary Tumor
TCGA-EM-A1YE-01	THCA	FEMALE	47	Primary Tumor
TCGA-EM-A2CR-01	THCA	FEMALE	46	Primary Tumor
TCGA-EM-A2OY-01	THCA	FEMALE	46	Primary Tumor
TCGA-BJ-A45E-01	THCA	FEMALE	46	Primary Tumor
TCGA-FY-A40K-01	THCA	FEMALE	46	Primary Tumor
TCGA-DJ-A2PY-01	THCA	FEMALE	46	Primary Tumor
TCGA-DJ-A3UX-01	THCA	FEMALE	46	Primary Tumor
TCGA-EM-A3O7-01	THCA	FEMALE	46	Primary Tumor
TCGA-KS-A4I9-01	THCA	FEMALE	46	Primary Tumor
TCGA-EL-A3H4-01	THCA	FEMALE	46	Primary Tumor
TCGA-ET-A2N5-01	THCA	FEMALE	46	Primary Tumor
TCGA-BJ-A28Z-01	THCA	FEMALE	46	Primary Tumor
TCGA-EM-A22K-01	THCA	FEMALE	46	Primary Tumor
TCGA-E3-A3E1-01	THCA	FEMALE	46	Primary Tumor
TCGA-EL-A3ZR-01	THCA	FEMALE	46	Primary Tumor
TCGA-DJ-A3UQ-01	THCA	FEMALE	45	Primary Tumor
TCGA-DJ-A3UM-01	THCA	FEMALE	45	Primary Tumor
TCGA-DJ-A13W-01	THCA	FEMALE	45	Primary Tumor
TCGA-KS-A4IC-01	THCA	FEMALE	45	Primary Tumor
TCGA-EM-A3AL-01	THCA	FEMALE	45	Primary Tumor
TCGA-ET-A4KQ-01	THCA	FEMALE	45	Primary Tumor
TCGA-EL-A3T0-01	THCA	FEMALE	45	Primary Tumor
TCGA-E8-A414-01	THCA	FEMALE	45	Primary Tumor
TCGA-EL-A3D5-01	THCA	FEMALE	44	Primary Tumor
TCGA-FE-A232-01	THCA	FEMALE	44	Primary Tumor
TCGA-DJ-A3V2-01	THCA	FEMALE	44	Primary Tumor
TCGA-DJ-A2Q1-01	THCA	FEMALE	44	Primary Tumor
TCGA-DE-A2OL-01	THCA	FEMALE	44	Primary Tumor
TCGA-ET-A3BO-01	THCA	FEMALE	44	Primary Tumor
TCGA-DJ-A3V7-01	THCA	FEMALE	44	Primary Tumor
TCGA-DE-A4MC-01	THCA	FEMALE	43	Primary Tumor
TCGA-EL-A4K2-01	THCA	FEMALE	43	Primary Tumor
TCGA-DJ-A3UT-01	THCA	FEMALE	43	Primary Tumor
TCGA-FK-A3S3-01	THCA	FEMALE	43	Primary Tumor
TCGA-EM-A3SU-01	THCA	FEMALE	43	Primary Tumor
TCGA-ET-A3DP-01	THCA	FEMALE	43	Primary Tumor
TCGA-ET-A3DQ-01	THCA	FEMALE	43	Primary Tumor
TCGA-BJ-A2N9-01	THCA	FEMALE	42	Primary Tumor
TCGA-EL-A3ZH-01	THCA	FEMALE	42	Primary Tumor
TCGA-EM-A3SZ-01	THCA	FEMALE	42	Primary Tumor
TCGA-IM-A41Y-01	THCA	FEMALE	42	Primary Tumor
TCGA-EM-A4FQ-01	THCA	FEMALE	42	Primary Tumor
TCGA-EM-A3FN-01	THCA	FEMALE	42	Primary Tumor
TCGA-ET-A3DR-01	THCA	FEMALE	42	Primary Tumor
TCGA-DJ-A1QN-01	THCA	FEMALE	42	Primary Tumor
TCGA-L6-A4EP-01	THCA	FEMALE	41	Primary Tumor
TCGA-KS-A4IB-01	THCA	FEMALE	41	Primary Tumor
TCGA-CE-A481-01	THCA	FEMALE	41	Primary Tumor
TCGA-EL-A4JV-01	THCA	FEMALE	41	Primary Tumor
TCGA-H2-A3RH-01	THCA	FEMALE	41	Primary Tumor
TCGA-MK-A4N9-01	THCA	FEMALE	41	Primary Tumor
TCGA-EL-A3GX-01	THCA	FEMALE	41	Primary Tumor
TCGA-EL-A3ZK-01	THCA	FEMALE	41	Primary Tumor
TCGA-EL-A3GY-01	THCA	FEMALE	40	Primary Tumor
TCGA-EM-A4FF-01	THCA	FEMALE	40	Primary Tumor
TCGA-H2-A422-01	THCA	FEMALE	40	Primary Tumor
TCGA-ET-A25J-01	THCA	FEMALE	40	Primary Tumor
TCGA-DJ-A2PS-01	THCA	FEMALE	40	Primary Tumor
TCGA-EM-A2CQ-01	THCA	FEMALE	40	Primary Tumor
TCGA-BJ-A45J-01	THCA	FEMALE	39	Primary Tumor
TCGA-KS-A41L-01	THCA	FEMALE	39	Primary Tumor
TCGA-DJ-A3VA-01	THCA	FEMALE	39	Primary Tumor
TCGA-IM-A420-01	THCA	FEMALE	39	Primary Tumor
TCGA-E8-A415-01	THCA	FEMALE	39	Primary Tumor
TCGA-EM-A1CW-01	THCA	FEMALE	39	Primary Tumor
TCGA-E8-A417-01	THCA	FEMALE	38	Primary Tumor
TCGA-EL-A3T1-01	THCA	FEMALE	38	Primary Tumor
TCGA-DJ-A2Q6-01	THCA	FEMALE	38	Primary Tumor
TCGA-BJ-A28R-01	THCA	FEMALE	38	Primary Tumor
TCGA-EL-A4JW-01	THCA	FEMALE	38	Primary Tumor
TCGA-E8-A413-01	THCA	FEMALE	38	Primary Tumor
TCGA-DJ-A4V2-01	THCA	FEMALE	38	Primary Tumor
TCGA-DJ-A3UP-01	THCA	FEMALE	38	Primary Tumor
TCGA-KS-A41F-01	THCA	FEMALE	37	Primary Tumor
TCGA-KS-A4I1-01	THCA	FEMALE	37	Primary Tumor
TCGA-EM-A2OW-01	THCA	FEMALE	37	Primary Tumor
TCGA-IM-A41Z-01	THCA	FEMALE	37	Primary Tumor
TCGA-DJ-A3US-01	THCA	FEMALE	37	Primary Tumor
TCGA-ET-A25I-01	THCA	FEMALE	37	Primary Tumor
TCGA-EL-A3GS-01	THCA	FEMALE	37	Primary Tumor
TCGA-EL-A3CZ-01	THCA	FEMALE	37	Primary Tumor
TCGA-FE-A3PC-01	THCA	FEMALE	37	Primary Tumor
TCGA-EL-A3GW-01	THCA	FEMALE	37	Primary Tumor
TCGA-CE-A484-01	THCA	FEMALE	37	Primary Tumor
TCGA-DJ-A13T-01	THCA	FEMALE	37	Primary Tumor
TCGA-FE-A238-01	THCA	FEMALE	36	Primary Tumor
TCGA-EM-A3AN-01	THCA	FEMALE	36	Primary Tumor
TCGA-DE-A7U5-01	THCA	FEMALE	36	Primary Tumor
TCGA-EL-A3H7-01	THCA	FEMALE	36	Primary Tumor
TCGA-EL-A4KH-01	THCA	FEMALE	36	Primary Tumor
TCGA-DJ-A4V0-01	THCA	FEMALE	36	Primary Tumor
TCGA-ET-A25K-01	THCA	FEMALE	36	Primary Tumor
TCGA-DJ-A4UR-01	THCA	FEMALE	36	Primary Tumor
TCGA-EL-A4KG-01	THCA	FEMALE	35	Primary Tumor
TCGA-EL-A3H8-01	THCA	FEMALE	35	Primary Tumor
TCGA-DJ-A3UK-01	THCA	FEMALE	35	Primary Tumor
TCGA-ET-A25O-01	THCA	FEMALE	35	Primary Tumor
TCGA-ET-A39N-01	THCA	FEMALE	35	Primary Tumor
TCGA-CE-A483-01	THCA	FEMALE	34	Primary Tumor
TCGA-H2-A421-01	THCA	FEMALE	34	Primary Tumor
TCGA-FY-A3I4-01	THCA	FEMALE	34	Primary Tumor
TCGA-E3-A3E2-01	THCA	FEMALE	34	Primary Tumor
TCGA-BJ-A28T-01	THCA	FEMALE	34	Primary Tumor
TCGA-E3-A3E0-01	THCA	FEMALE	34	Primary Tumor
TCGA-EL-A3GZ-01	THCA	FEMALE	34	Primary Tumor
TCGA-DJ-A4UW-01	THCA	FEMALE	34	Primary Tumor
TCGA-ET-A2N3-01	THCA	FEMALE	34	Primary Tumor
TCGA-EL-A3T6-01	THCA	FEMALE	34	Primary Tumor
TCGA-DE-A69J-01	THCA	FEMALE	34	Primary Tumor
TCGA-EL-A3ZL-01	THCA	FEMALE	34	Primary Tumor
TCGA-ET-A3BP-01	THCA	FEMALE	34	Primary Tumor
TCGA-J8-A3O1-01	THCA	FEMALE	33	Primary Tumor
TCGA-EM-A3OB-01	THCA	FEMALE	33	Primary Tumor
TCGA-EM-A4FK-01	THCA	FEMALE	33	Primary Tumor
TCGA-ET-A3DO-01	THCA	FEMALE	33	Primary Tumor
TCGA-EM-A3O8-01	THCA	FEMALE	33	Primary Tumor
TCGA-EL-A4K4-01	THCA	FEMALE	33	Primary Tumor
TCGA-ET-A3BN-01	THCA	FEMALE	33	Primary Tumor
TCGA-FE-A3PB-01	THCA	FEMALE	33	Primary Tumor
TCGA-BJ-A0Z3-01	THCA	FEMALE	33	Primary Tumor
TCGA-EM-A22L-01	THCA	FEMALE	33	Primary Tumor
TCGA-ET-A3DS-01	THCA	FEMALE	33	Primary Tumor
TCGA-GE-A2C6-01	THCA	FEMALE	33	Primary Tumor
TCGA-DJ-A3VD-01	THCA	FEMALE	32	Primary Tumor
TCGA-IM-A3EB-01	THCA	FEMALE	32	Primary Tumor
TCGA-DJ-A4UT-01	THCA	FEMALE	32	Primary Tumor
TCGA-BJ-A28W-01	THCA	FEMALE	32	Primary Tumor
TCGA-DJ-A3UY-01	THCA	FEMALE	32	Primary Tumor
TCGA-BJ-A28X-01	THCA	FEMALE	32	Primary Tumor
TCGA-EM-A1CV-01	THCA	FEMALE	32	Primary Tumor
TCGA-ET-A40P-01	THCA	FEMALE	32	Primary Tumor
TCGA-EL-A4JX-01	THCA	FEMALE	31	Primary Tumor
TCGA-FK-A3SE-01	THCA	FEMALE	31	Primary Tumor
TCGA-J8-A3YE-01	THCA	FEMALE	31	Primary Tumor
TCGA-EL-A3GR-01	THCA	FEMALE	31	Primary Tumor
TCGA-EM-A3AP-01	THCA	FEMALE	31	Primary Tumor
TCGA-EL-A3GO-01	THCA	FEMALE	31	Primary Tumor
TCGA-ET-A3BW-01	THCA	FEMALE	30	Primary Tumor
TCGA-DE-A0Y2-01	THCA	FEMALE	30	Primary Tumor
TCGA-BJ-A2N8-01	THCA	FEMALE	30	Primary Tumor
TCGA-E8-A419-01	THCA	FEMALE	30	Primary Tumor
TCGA-FE-A230-01	THCA	FEMALE	30	Primary Tumor
TCGA-DO-A1K0-01	THCA	FEMALE	30	Primary Tumor
TCGA-BJ-A2N7-01	THCA	FEMALE	30	Primary Tumor
TCGA-EM-A3FK-01	THCA	FEMALE	30	Primary Tumor
TCGA-CE-A13K-01	THCA	FEMALE	30	Primary Tumor
TCGA-H2-A3RI-01	THCA	FEMALE	29	Primary Tumor
TCGA-BJ-A2P4-01	THCA	FEMALE	29	Primary Tumor
TCGA-FK-A3SB-01	THCA	FEMALE	28	Primary Tumor
TCGA-KS-A41J-01	THCA	FEMALE	28	Primary Tumor
TCGA-DJ-A3V8-01	THCA	FEMALE	28	Primary Tumor
TCGA-CE-A27D-01	THCA	FEMALE	28	Primary Tumor
TCGA-EL-A3ZN-01	THCA	FEMALE	28	Primary Tumor
TCGA-ET-A25N-01	THCA	FEMALE	28	Primary Tumor
TCGA-EM-A3SX-01	THCA	FEMALE	28	Primary Tumor
TCGA-DJ-A13M-01	THCA	FEMALE	28	Primary Tumor
TCGA-ET-A39S-01	THCA	FEMALE	27	Primary Tumor
TCGA-CE-A482-01	THCA	FEMALE	27	Primary Tumor
TCGA-ET-A3BQ-01	THCA	FEMALE	27	Primary Tumor
TCGA-FE-A23A-01	THCA	FEMALE	27	Primary Tumor
TCGA-EM-A4G1-01	THCA	FEMALE	26	Primary Tumor
TCGA-FE-A234-01	THCA	FEMALE	26	Primary Tumor
TCGA-EM-A2CP-01	THCA	FEMALE	26	Primary Tumor
TCGA-ET-A40T-01	THCA	FEMALE	26	Primary Tumor
TCGA-FE-A235-01	THCA	FEMALE	26	Primary Tumor
TCGA-E8-A433-01	THCA	FEMALE	25	Primary Tumor
TCGA-ET-A25P-01	THCA	FEMALE	24	Primary Tumor
TCGA-ET-A39R-01	THCA	FEMALE	24	Primary Tumor
TCGA-ET-A40R-01	THCA	FEMALE	24	Primary Tumor
TCGA-EM-A3FJ-01	THCA	FEMALE	24	Primary Tumor
TCGA-EL-A3N2-01	THCA	FEMALE	24	Primary Tumor
TCGA-DO-A1JZ-01	THCA	FEMALE	23	Primary Tumor
TCGA-E8-A44M-01	THCA	FEMALE	23	Primary Tumor
TCGA-E8-A438-01	THCA	FEMALE	23	Primary Tumor
TCGA-ET-A39J-01	THCA	FEMALE	23	Primary Tumor
TCGA-ET-A3DT-01	THCA	FEMALE	23	Primary Tumor
TCGA-EL-A3ZS-01	THCA	FEMALE	22	Primary Tumor
TCGA-EL-A3CX-01	THCA	FEMALE	22	Primary Tumor
TCGA-FY-A3RA-01	THCA	FEMALE	21	Primary Tumor
TCGA-ET-A3DU-01	THCA	FEMALE	21	Primary Tumor
TCGA-DJ-A13V-01	THCA	FEMALE	21	Primary Tumor
TCGA-FK-A3SG-01	THCA	FEMALE	21	Primary Tumor
TCGA-MK-A4N7-01	THCA	FEMALE	20	Primary Tumor
TCGA-EM-A2CT-01	THCA	FEMALE	20	Primary Tumor
TCGA-DJ-A1QD-01	THCA	FEMALE	20	Primary Tumor
TCGA-ET-A39L-01	THCA	FEMALE	20	Primary Tumor
TCGA-EL-A3H3-01	THCA	FEMALE	19	Primary Tumor
TCGA-DJ-A13S-01	THCA	FEMALE	19	Primary Tumor
TCGA-EM-A3FQ-01	THCA	FEMALE	19	Primary Tumor
TCGA-FE-A237-01	THCA	FEMALE	19	Primary Tumor
TCGA-E8-A2JQ-01	THCA	FEMALE	18	Primary Tumor
TCGA-DJ-A3UV-01	THCA	FEMALE	18	Primary Tumor
TCGA-FE-A233-01	THCA	FEMALE	18	Primary Tumor
TCGA-FE-A3PD-01	THCA	FEMALE	17	Primary Tumor
TCGA-DJ-A4UP-01	THCA	FEMALE	15	Primary Tumor
TCGA-EL-A3CO-01	THCA	MALE	88	Primary Tumor
TCGA-DJ-A13L-01	THCA	MALE	85	Primary Tumor
TCGA-J8-A3YF-01	THCA	MALE	83	Primary Tumor
TCGA-FE-A239-01	THCA	MALE	82	Primary Tumor
TCGA-EL-A3MY-01	THCA	MALE	81	Primary Tumor
TCGA-BJ-A0ZG-01	THCA	MALE	80	Primary Tumor
TCGA-BJ-A28S-01	THCA	MALE	79	Primary Tumor
TCGA-BJ-A45C-01	THCA	MALE	78	Primary Tumor
TCGA-BJ-A2NA-01	THCA	MALE	77	Primary Tumor
TCGA-EM-A1CT-01	THCA	MALE	76	Primary Tumor
TCGA-FY-A4B0-01	THCA	MALE	76	Primary Tumor
TCGA-EL-A4K6-01	THCA	MALE	75	Primary Tumor
TCGA-EM-A22O-01	THCA	MALE	75	Primary Tumor
TCGA-EL-A4K7-01	THCA	MALE	74	Primary Tumor
TCGA-MK-A84Z-01	THCA	MALE	74	Primary Tumor
TCGA-EM-A4FO-01	THCA	MALE	72	Primary Tumor
TCGA-DE-A4MD-01	THCA	MALE	71	Primary Tumor
TCGA-EL-A3GP-01	THCA	MALE	70	Primary Tumor
TCGA-BJ-A290-01	THCA	MALE	70	Primary Tumor
TCGA-DJ-A1QL-01	THCA	MALE	70	Primary Tumor
TCGA-FE-A231-01	THCA	MALE	70	Primary Tumor
TCGA-FY-A3NP-01	THCA	MALE	69	Primary Tumor
TCGA-EM-A4FH-01	THCA	MALE	69	Primary Tumor
TCGA-DJ-A1QO-01	THCA	MALE	69	Primary Tumor
TCGA-EL-A4K9-01	THCA	MALE	68	Primary Tumor
TCGA-EL-A3MZ-01	THCA	MALE	66	Primary Tumor
TCGA-BJ-A0ZB-01	THCA	MALE	66	Primary Tumor
TCGA-EM-A2OZ-01	THCA	MALE	66	Primary Tumor
TCGA-DJ-A2PW-01	THCA	MALE	65	Primary Tumor
TCGA-BJ-A0YZ-01	THCA	MALE	65	Primary Tumor
TCGA-ET-A3DW-01	THCA	MALE	64	Primary Tumor
TCGA-EM-A22P-01	THCA	MALE	64	Primary Tumor
TCGA-EL-A4KI-01	THCA	MALE	63	Primary Tumor
TCGA-EL-A3T3-01	THCA	MALE	63	Primary Tumor
TCGA-DJ-A3UO-01	THCA	MALE	63	Primary Tumor
TCGA-DJ-A2PZ-01	THCA	MALE	63	Primary Tumor
TCGA-DJ-A3VK-01	THCA	MALE	63	Primary Tumor
TCGA-EM-A2CN-01	THCA	MALE	62	Primary Tumor
TCGA-EL-A3D4-01	THCA	MALE	62	Primary Tumor
TCGA-DJ-A1QG-01	THCA	MALE	62	Primary Tumor
TCGA-ET-A40S-01	THCA	MALE	62	Primary Tumor
TCGA-EL-A3D0-01	THCA	MALE	61	Primary Tumor
TCGA-EM-A3AO-01	THCA	MALE	61	Primary Tumor
TCGA-EL-A3ZM-01	THCA	MALE	60	Primary Tumor
TCGA-DJ-A13U-01	THCA	MALE	60	Primary Tumor
TCGA-DJ-A4UQ-01	THCA	MALE	60	Primary Tumor
TCGA-BJ-A18Z-01	THCA	MALE	58	Primary Tumor
TCGA-BJ-A0Z5-01	THCA	MALE	58	Primary Tumor
TCGA-EL-A3H2-01	THCA	MALE	58	Primary Tumor
TCGA-EM-A3FM-01	THCA	MALE	57	Primary Tumor
TCGA-E3-A3E5-01	THCA	MALE	57	Primary Tumor
TCGA-BJ-A0Z2-01	THCA	MALE	57	Primary Tumor
TCGA-DJ-A3V0-01	THCA	MALE	56	Primary Tumor
TCGA-DJ-A13O-01	THCA	MALE	56	Primary Tumor
TCGA-BJ-A0Z0-01	THCA	MALE	55	Primary Tumor
TCGA-BJ-A190-01	THCA	MALE	55	Primary Tumor
TCGA-DJ-A4V5-01	THCA	MALE	55	Primary Tumor
TCGA-BJ-A0ZC-01	THCA	MALE	55	Primary Tumor
TCGA-DJ-A3V6-01	THCA	MALE	54	Primary Tumor
TCGA-DJ-A2PO-01	THCA	MALE	54	Primary Tumor
TCGA-FY-A76V-01	THCA	MALE	54	Primary Tumor
TCGA-DJ-A2Q4-01	THCA	MALE	53	Primary Tumor
TCGA-BJ-A3PU-01	THCA	MALE	52	Primary Tumor
TCGA-DJ-A3VB-01	THCA	MALE	52	Primary Tumor
TCGA-EM-A22M-01	THCA	MALE	52	Primary Tumor
TCGA-FK-A4UB-01	THCA	MALE	51	Primary Tumor
TCGA-FY-A4B3-01	THCA	MALE	51	Primary Tumor
TCGA-DJ-A2Q5-01	THCA	MALE	51	Primary Tumor
TCGA-BJ-A3EZ-01	THCA	MALE	51	Primary Tumor
TCGA-DJ-A13R-01	THCA	MALE	50	Primary Tumor
TCGA-DJ-A3VE-01	THCA	MALE	50	Primary Tumor
TCGA-DO-A2HM-01	THCA	MALE	49	Primary Tumor
TCGA-L6-A4EQ-01	THCA	MALE	47	Primary Tumor
TCGA-BJ-A4O8-01	THCA	MALE	47	Primary Tumor
TCGA-DJ-A2PP-01	THCA	MALE	47	Primary Tumor
TCGA-EM-A2P2-01	THCA	MALE	46	Primary Tumor
TCGA-EM-A2OX-01	THCA	MALE	46	Primary Tumor
TCGA-BJ-A45H-01	THCA	MALE	45	Primary Tumor
TCGA-J8-A42S-01	THCA	MALE	45	Primary Tumor
TCGA-DJ-A1QQ-01	THCA	MALE	43	Primary Tumor
TCGA-ET-A3BS-01	THCA	MALE	42	Primary Tumor
TCGA-EL-A3TA-01	THCA	MALE	42	Primary Tumor
TCGA-DJ-A1QM-01	THCA	MALE	42	Primary Tumor
TCGA-KS-A4I3-01	THCA	MALE	41	Primary Tumor
TCGA-EL-A4KD-01	THCA	MALE	41	Primary Tumor
TCGA-EM-A3AR-01	THCA	MALE	41	Primary Tumor
TCGA-DJ-A3VG-01	THCA	MALE	40	Primary Tumor
TCGA-EM-A3FO-01	THCA	MALE	40	Primary Tumor
TCGA-EL-A3CV-01	THCA	MALE	40	Primary Tumor
TCGA-EM-A3O9-01	THCA	MALE	40	Primary Tumor
TCGA-EM-A3AJ-01	THCA	MALE	39	Primary Tumor
TCGA-ET-A39O-01	THCA	MALE	39	Primary Tumor
TCGA-J8-A3O2-01	THCA	MALE	39	Primary Tumor
TCGA-J8-A3YH-01	THCA	MALE	39	Primary Tumor
TCGA-EL-A3D1-01	THCA	MALE	39	Primary Tumor
TCGA-ET-A2MZ-01	THCA	MALE	39	Primary Tumor
TCGA-DJ-A3VL-01	THCA	MALE	38	Primary Tumor
TCGA-ET-A40Q-01	THCA	MALE	38	Primary Tumor
TCGA-J8-A3O0-01	THCA	MALE	38	Primary Tumor
TCGA-IM-A4EB-01	THCA	MALE	37	Primary Tumor
TCGA-E3-A3DY-01	THCA	MALE	37	Primary Tumor
TCGA-EL-A3T8-01	THCA	MALE	36	Primary Tumor
TCGA-BJ-A0ZJ-01	THCA	MALE	36	Primary Tumor
TCGA-BJ-A45D-01	THCA	MALE	36	Primary Tumor
TCGA-EM-A22Q-01	THCA	MALE	36	Primary Tumor
TCGA-EM-A3SY-01	THCA	MALE	36	Primary Tumor
TCGA-EL-A3ZT-01	THCA	MALE	35	Primary Tumor
TCGA-MK-A4N6-01	THCA	MALE	35	Primary Tumor
TCGA-EM-A4FU-01	THCA	MALE	35	Primary Tumor
TCGA-ET-A39M-01	THCA	MALE	34	Primary Tumor
TCGA-BJ-A45K-01	THCA	MALE	33	Primary Tumor
TCGA-EM-A2P0-01	THCA	MALE	33	Primary Tumor
TCGA-EM-A2P1-01	THCA	MALE	33	Primary Tumor
TCGA-FE-A236-01	THCA	MALE	33	Primary Tumor
TCGA-ET-A25M-01	THCA	MALE	33	Primary Tumor
TCGA-CE-A485-01	THCA	MALE	32	Primary Tumor
TCGA-EM-A1CU-01	THCA	MALE	31	Primary Tumor
TCGA-EM-A2CL-01	THCA	MALE	31	Primary Tumor
TCGA-CE-A3MD-01	THCA	MALE	31	Primary Tumor
TCGA-FY-A3BL-01	THCA	MALE	29	Primary Tumor
TCGA-BJ-A18Y-01	THCA	MALE	29	Primary Tumor
TCGA-DE-A4M9-01	THCA	MALE	28	Primary Tumor
TCGA-EL-A3CY-01	THCA	MALE	28	Primary Tumor
TCGA-ET-A3BU-01	THCA	MALE	28	Primary Tumor
TCGA-EM-A2CK-01	THCA	MALE	28	Primary Tumor
TCGA-EM-A4FR-01	THCA	MALE	28	Primary Tumor
TCGA-ET-A2MX-01	THCA	MALE	27	Primary Tumor
TCGA-DJ-A2PR-01	THCA	MALE	27	Primary Tumor
TCGA-DJ-A2PQ-01	THCA	MALE	26	Primary Tumor
TCGA-H2-A2K9-01	THCA	MALE	25	Primary Tumor
TCGA-ET-A3BX-01	THCA	MALE	24	Primary Tumor
TCGA-DJ-A3VJ-01	THCA	MALE	22	Primary Tumor
TCGA-FY-A3ON-01	THCA	MALE	20	Primary Tumor
TCGA-EL-A3ZP-01	THCA	MALE	19	Primary Tumor
TCGA-FE-A3PA-01	THCA	MALE	16	Primary Tumor
TCGA-EL-A3ZG-01	THCA	MALE	15	Primary Tumor
TCGA-UE-A6QU-01	SARC	FEMALE	90	Primary Tumor
TCGA-X6-A7WA-01	SARC	FEMALE	90	Primary Tumor
TCGA-DX-A7EF-01	SARC	FEMALE	88	Primary Tumor
TCGA-DX-AB2Z-01	SARC	FEMALE	87	Primary Tumor
TCGA-DX-A6YQ-01	SARC	FEMALE	86	Primary Tumor
TCGA-DX-A6BK-01	SARC	FEMALE	85	Primary Tumor
TCGA-IE-A4EJ-01	SARC	FEMALE	84	Primary Tumor
TCGA-DX-A8BG-01	SARC	FEMALE	83	Primary Tumor
TCGA-IF-A4AK-01	SARC	FEMALE	82	Primary Tumor
TCGA-DX-A6BF-01	SARC	FEMALE	82	Primary Tumor
TCGA-DX-A6Z2-01	SARC	FEMALE	82	Primary Tumor
TCGA-SI-AA8B-01	SARC	FEMALE	80	Primary Tumor
TCGA-DX-AB2H-01	SARC	FEMALE	80	Primary Tumor
TCGA-DX-A7EU-01	SARC	FEMALE	79	Primary Tumor
TCGA-DX-A7EI-01	SARC	FEMALE	78	Primary Tumor
TCGA-DX-AB2O-01	SARC	FEMALE	78	Primary Tumor
TCGA-DX-A8BN-01	SARC	FEMALE	78	Primary Tumor
TCGA-HB-A2OT-01	SARC	FEMALE	78	Primary Tumor
TCGA-DX-A3LS-01	SARC	FEMALE	78	Primary Tumor
TCGA-DX-A6Z0-01	SARC	FEMALE	78	Primary Tumor
TCGA-DX-A8BZ-01	SARC	FEMALE	78	Primary Tumor
TCGA-PC-A5DN-01	SARC	FEMALE	77	Primary Tumor
TCGA-IW-A3M5-01	SARC	FEMALE	76	Primary Tumor
TCGA-DX-AB2F-01	SARC	FEMALE	76	Primary Tumor
TCGA-LI-A67I-01	SARC	FEMALE	75	Primary Tumor
TCGA-MO-A47R-01	SARC	FEMALE	75	Primary Tumor
TCGA-DX-AB37-01	SARC	FEMALE	73	Primary Tumor
TCGA-IS-A3KA-01	SARC	FEMALE	73	Primary Tumor
TCGA-DX-AB2X-01	SARC	FEMALE	73	Primary Tumor
TCGA-PC-A5DP-01	SARC	FEMALE	72	Primary Tumor
TCGA-LI-A9QH-01	SARC	FEMALE	72	Primary Tumor
TCGA-KF-A41W-01	SARC	FEMALE	71	Primary Tumor
TCGA-DX-AB2J-01	SARC	FEMALE	71	Primary Tumor
TCGA-IF-A3RQ-01	SARC	FEMALE	70	Primary Tumor
TCGA-3B-A9HX-01	SARC	FEMALE	70	Primary Tumor
TCGA-X6-A8C4-01	SARC	FEMALE	70	Primary Tumor
TCGA-JV-A5VF-01	SARC	FEMALE	69	Primary Tumor
TCGA-KD-A5QT-01	SARC	FEMALE	69	Primary Tumor
TCGA-HS-A5N8-01	SARC	FEMALE	69	Primary Tumor
TCGA-DX-A8BS-01	SARC	FEMALE	68	Primary Tumor
TCGA-QQ-A8VB-01	SARC	FEMALE	68	Primary Tumor
TCGA-DX-A6YX-01	SARC	FEMALE	68	Primary Tumor
TCGA-DX-A1KX-01	SARC	FEMALE	67	Primary Tumor
TCGA-IE-A4EI-01	SARC	FEMALE	67	Primary Tumor
TCGA-DX-A8BO-01	SARC	FEMALE	67	Primary Tumor
TCGA-HS-A5N7-01	SARC	FEMALE	67	Primary Tumor
TCGA-K1-A6RU-01	SARC	FEMALE	66	Primary Tumor
TCGA-WK-A8XO-01	SARC	FEMALE	66	Primary Tumor
TCGA-3B-A9HQ-01	SARC	FEMALE	66	Primary Tumor
TCGA-DX-A3UE-01	SARC	FEMALE	66	Primary Tumor
TCGA-K1-A42W-01	SARC	FEMALE	65	Primary Tumor
TCGA-IE-A6BZ-01	SARC	FEMALE	65	Primary Tumor
TCGA-DX-A3UF-01	SARC	FEMALE	65	Primary Tumor
TCGA-DX-AB2Q-01	SARC	FEMALE	65	Primary Tumor
TCGA-HS-A5NA-01	SARC	FEMALE	65	Primary Tumor
TCGA-FX-A3RE-01	SARC	FEMALE	65	Primary Tumor
TCGA-K1-A3PN-01	SARC	FEMALE	64	Primary Tumor
TCGA-Z4-AAPG-01	SARC	FEMALE	64	Primary Tumor
TCGA-DX-A8BT-01	SARC	FEMALE	63	Primary Tumor
TCGA-DX-A48O-01	SARC	FEMALE	63	Primary Tumor
TCGA-DX-A8BR-01	SARC	FEMALE	63	Primary Tumor
TCGA-DX-A3U6-01	SARC	FEMALE	63	Primary Tumor
TCGA-X6-A7WD-01	SARC	FEMALE	63	Primary Tumor
TCGA-QQ-A5VC-01	SARC	FEMALE	63	Primary Tumor
TCGA-X6-A8C5-01	SARC	FEMALE	63	Primary Tumor
TCGA-IS-A3K7-01	SARC	FEMALE	63	Primary Tumor
TCGA-K1-A42X-01	SARC	FEMALE	62	Primary Tumor
TCGA-RN-A68Q-01	SARC	FEMALE	62	Primary Tumor
TCGA-DX-AB2W-01	SARC	FEMALE	62	Primary Tumor
TCGA-FX-A2QS-01	SARC	FEMALE	61	Primary Tumor
TCGA-DX-A8BK-01	SARC	FEMALE	61	Primary Tumor
TCGA-MB-A5Y8-01	SARC	FEMALE	60	Primary Tumor
TCGA-DX-A1L3-01	SARC	FEMALE	60	Primary Tumor
TCGA-QQ-A5VA-01	SARC	FEMALE	60	Primary Tumor
TCGA-JV-A5VE-01	SARC	FEMALE	60	Primary Tumor
TCGA-WP-A9GB-01	SARC	FEMALE	59	Primary Tumor
TCGA-IW-A3M6-01	SARC	FEMALE	59	Primary Tumor
TCGA-X6-A8C3-01	SARC	FEMALE	59	Primary Tumor
TCGA-PC-A5DO-01	SARC	FEMALE	59	Primary Tumor
TCGA-HS-A5N9-01	SARC	FEMALE	58	Primary Tumor
TCGA-HB-A5W3-01	SARC	FEMALE	58	Primary Tumor
TCGA-WK-A8XS-01	SARC	FEMALE	58	Primary Tumor
TCGA-X6-A7WB-01	SARC	FEMALE	58	Primary Tumor
TCGA-HB-A43Z-01	SARC	FEMALE	58	Primary Tumor
TCGA-PT-A8TR-01	SARC	FEMALE	57	Primary Tumor
TCGA-MJ-A68H-01	SARC	FEMALE	57	Primary Tumor
TCGA-DX-A23V-01	SARC	FEMALE	57	Primary Tumor
TCGA-3B-A9HP-01	SARC	FEMALE	57	Primary Tumor
TCGA-WK-A8XZ-01	SARC	FEMALE	56	Primary Tumor
TCGA-3B-A9I1-01	SARC	FEMALE	56	Primary Tumor
TCGA-DX-A7EL-01	SARC	FEMALE	56	Primary Tumor
TCGA-FX-A48G-01	SARC	FEMALE	56	Primary Tumor
TCGA-DX-A23R-01	SARC	FEMALE	55	Primary Tumor
TCGA-KD-A5QS-01	SARC	FEMALE	55	Primary Tumor
TCGA-MJ-A68J-01	SARC	FEMALE	55	Primary Tumor
TCGA-IS-A3K6-01	SARC	FEMALE	55	Primary Tumor
TCGA-DX-AB2T-01	SARC	FEMALE	54	Primary Tumor
TCGA-DX-A48P-01	SARC	FEMALE	54	Primary Tumor
TCGA-DX-A6BA-01	SARC	FEMALE	53	Primary Tumor
TCGA-WK-A8XY-01	SARC	FEMALE	53	Primary Tumor
TCGA-QC-AA9N-01	SARC	FEMALE	53	Primary Tumor
TCGA-QQ-A5VB-01	SARC	FEMALE	53	Primary Tumor
TCGA-DX-AB30-01	SARC	FEMALE	53	Primary Tumor
TCGA-DX-AB2S-01	SARC	FEMALE	53	Primary Tumor
TCGA-3B-A9HU-01	SARC	FEMALE	53	Primary Tumor
TCGA-MB-A8JL-01	SARC	FEMALE	53	Primary Tumor
TCGA-DX-A7EN-01	SARC	FEMALE	53	Primary Tumor
TCGA-X9-A971-01	SARC	FEMALE	52	Primary Tumor
TCGA-DX-A6YU-01	SARC	FEMALE	50	Primary Tumor
TCGA-UE-A6QT-01	SARC	FEMALE	50	Primary Tumor
TCGA-DX-A7ES-01	SARC	FEMALE	50	Primary Tumor
TCGA-WK-A8Y0-01	SARC	FEMALE	49	Primary Tumor
TCGA-VT-A80J-01	SARC	FEMALE	49	Primary Tumor
TCGA-FX-A76Y-01	SARC	FEMALE	49	Primary Tumor
TCGA-DX-A48L-01	SARC	FEMALE	49	Primary Tumor
TCGA-X2-A95T-01	SARC	FEMALE	49	Primary Tumor
TCGA-3B-A9HV-01	SARC	FEMALE	48	Primary Tumor
TCGA-IW-A3M4-01	SARC	FEMALE	48	Primary Tumor
TCGA-DX-A3UA-01	SARC	FEMALE	47	Primary Tumor
TCGA-HB-A3L4-01	SARC	FEMALE	46	Primary Tumor
TCGA-DX-A6B9-01	SARC	FEMALE	45	Primary Tumor
TCGA-SG-A6Z7-01	SARC	FEMALE	44	Primary Tumor
TCGA-IS-A3K8-01	SARC	FEMALE	44	Primary Tumor
TCGA-JV-A75J-01	SARC	FEMALE	43	Primary Tumor
TCGA-KD-A5QU-01	SARC	FEMALE	41	Primary Tumor
TCGA-N1-A6IA-01	SARC	FEMALE	41	Primary Tumor
TCGA-DX-A23T-01	SARC	FEMALE	40	Primary Tumor
TCGA-WK-A8XT-01	SARC	FEMALE	40	Primary Tumor
TCGA-3B-A9HR-01	SARC	FEMALE	38	Primary Tumor
TCGA-MO-A47P-01	SARC	FEMALE	37	Primary Tumor
TCGA-DX-A3UC-01	SARC	FEMALE	37	Primary Tumor
TCGA-Z4-AAPF-01	SARC	FEMALE	35	Primary Tumor
TCGA-IE-A4EH-01	SARC	FEMALE	35	Primary Tumor
TCGA-SI-A71Q-01	SARC	FEMALE	34	Primary Tumor
TCGA-FX-A8OO-01	SARC	FEMALE	31	Primary Tumor
TCGA-QQ-A8VH-01	SARC	FEMALE	31	Primary Tumor
TCGA-DX-A6YT-01	SARC	FEMALE	31	Primary Tumor
TCGA-DX-AB3B-01	SARC	FEMALE	28	Primary Tumor
TCGA-Z4-A8JB-01	SARC	FEMALE	24	Primary Tumor
TCGA-X6-A8C7-01	SARC	FEMALE	24	Primary Tumor
TCGA-SI-AA8C-01	SARC	FEMALE	20	Primary Tumor
TCGA-DX-A7EO-01	SARC	FEMALE	20	Primary Tumor
TCGA-MB-A5Y9-01	SARC	MALE	90	Primary Tumor
TCGA-X6-A7W8-01	SARC	MALE	89	Primary Tumor
TCGA-FX-A3TO-01	SARC	MALE	87	Primary Tumor
TCGA-DX-AB36-01	SARC	MALE	86	Primary Tumor
TCGA-DX-A8BH-01	SARC	MALE	86	Primary Tumor
TCGA-DX-A8BP-01	SARC	MALE	85	Primary Tumor
TCGA-DX-A3U9-01	SARC	MALE	84	Primary Tumor
TCGA-DX-A1KU-01	SARC	MALE	82	Primary Tumor
TCGA-DX-AB2V-01	SARC	MALE	81	Primary Tumor
TCGA-DX-A23U-01	SARC	MALE	81	Primary Tumor
TCGA-DX-A23Y-01	SARC	MALE	80	Primary Tumor
TCGA-DX-AB3A-01	SARC	MALE	80	Primary Tumor
TCGA-IF-A4AJ-01	SARC	MALE	80	Primary Tumor
TCGA-DX-A6B8-01	SARC	MALE	80	Primary Tumor
TCGA-DX-A3M1-01	SARC	MALE	79	Primary Tumor
TCGA-DX-AB2P-01	SARC	MALE	79	Primary Tumor
TCGA-SG-A849-01	SARC	MALE	78	Primary Tumor
TCGA-DX-A1L2-01	SARC	MALE	78	Primary Tumor
TCGA-DX-A48V-01	SARC	MALE	78	Primary Tumor
TCGA-DX-A6BE-01	SARC	MALE	77	Primary Tumor
TCGA-QQ-A5V9-01	SARC	MALE	76	Primary Tumor
TCGA-DX-A8BJ-01	SARC	MALE	76	Primary Tumor
TCGA-HB-A3YV-01	SARC	MALE	75	Primary Tumor
TCGA-3B-A9HO-01	SARC	MALE	75	Primary Tumor
TCGA-DX-A6YR-01	SARC	MALE	75	Primary Tumor
TCGA-QC-A7B5-01	SARC	MALE	75	Primary Tumor
TCGA-X6-A7WC-01	SARC	MALE	74	Primary Tumor
TCGA-DX-A6BB-01	SARC	MALE	74	Primary Tumor
TCGA-DX-A23Z-01	SARC	MALE	74	Primary Tumor
TCGA-DX-A6YV-01	SARC	MALE	74	Primary Tumor
TCGA-PC-A5DM-01	SARC	MALE	73	Primary Tumor
TCGA-DX-A7EQ-01	SARC	MALE	72	Primary Tumor
TCGA-DX-AATS-01	SARC	MALE	72	Primary Tumor
TCGA-DX-A7ET-01	SARC	MALE	71	Primary Tumor
TCGA-VT-AB3D-01	SARC	MALE	71	Primary Tumor
TCGA-QQ-A8VF-01	SARC	MALE	70	Primary Tumor
TCGA-WK-A8XX-01	SARC	MALE	70	Primary Tumor
TCGA-DX-A7ER-01	SARC	MALE	69	Primary Tumor
TCGA-QC-A6FX-01	SARC	MALE	68	Primary Tumor
TCGA-3B-A9HI-01	SARC	MALE	68	Primary Tumor
TCGA-3B-A9HJ-01	SARC	MALE	68	Primary Tumor
TCGA-DX-A1KW-01	SARC	MALE	67	Primary Tumor
TCGA-DX-A3U7-01	SARC	MALE	67	Primary Tumor
TCGA-3B-A9HL-01	SARC	MALE	67	Primary Tumor
TCGA-K1-A6RV-01	SARC	MALE	67	Primary Tumor
TCGA-PC-A5DL-01	SARC	MALE	67	Primary Tumor
TCGA-DX-A1KZ-01	SARC	MALE	66	Primary Tumor
TCGA-3R-A8YX-01	SARC	MALE	66	Primary Tumor
TCGA-VT-A80G-01	SARC	MALE	66	Primary Tumor
TCGA-3B-A9HZ-01	SARC	MALE	66	Primary Tumor
TCGA-DX-A3LY-01	SARC	MALE	66	Primary Tumor
TCGA-DX-A1KY-01	SARC	MALE	66	Primary Tumor
TCGA-DX-AB35-01	SARC	MALE	65	Primary Tumor
TCGA-DX-A48K-01	SARC	MALE	65	Primary Tumor
TCGA-DX-A8BQ-01	SARC	MALE	63	Primary Tumor
TCGA-MB-A5YA-01	SARC	MALE	63	Primary Tumor
TCGA-PC-A5DK-01	SARC	MALE	63	Primary Tumor
TCGA-3B-A9I3-01	SARC	MALE	62	Primary Tumor
TCGA-DX-A3LT-01	SARC	MALE	62	Primary Tumor
TCGA-DX-A2J0-01	SARC	MALE	61	Primary Tumor
TCGA-DX-A6YS-01	SARC	MALE	61	Primary Tumor
TCGA-DX-A7EM-01	SARC	MALE	61	Primary Tumor
TCGA-DX-A8BM-01	SARC	MALE	60	Primary Tumor
TCGA-3B-A9HS-01	SARC	MALE	60	Primary Tumor
TCGA-DX-A3LU-01	SARC	MALE	60	Primary Tumor
TCGA-DX-A2J4-01	SARC	MALE	60	Primary Tumor
TCGA-DX-A1L4-01	SARC	MALE	60	Primary Tumor
TCGA-DX-A1L1-01	SARC	MALE	60	Primary Tumor
TCGA-DX-A2IZ-01	SARC	MALE	60	Primary Tumor
TCGA-DX-AB2E-01	SARC	MALE	60	Primary Tumor
TCGA-DX-A6YZ-01	SARC	MALE	59	Primary Tumor
TCGA-DX-A8BL-01	SARC	MALE	59	Primary Tumor
TCGA-DX-A3M2-01	SARC	MALE	59	Primary Tumor
TCGA-DX-A1L0-01	SARC	MALE	58	Primary Tumor
TCGA-DX-A8BU-01	SARC	MALE	58	Primary Tumor
TCGA-DX-A48U-01	SARC	MALE	57	Primary Tumor
TCGA-DX-A8BV-01	SARC	MALE	57	Primary Tumor
TCGA-WK-A8XQ-01	SARC	MALE	57	Primary Tumor
TCGA-X6-A8C2-01	SARC	MALE	56	Primary Tumor
TCGA-DX-A3UD-01	SARC	MALE	56	Primary Tumor
TCGA-QQ-A8VD-01	SARC	MALE	56	Primary Tumor
TCGA-X6-A8C6-01	SARC	MALE	55	Primary Tumor
TCGA-X9-A973-01	SARC	MALE	55	Primary Tumor
TCGA-DX-A6B7-01	SARC	MALE	55	Primary Tumor
TCGA-DX-A3UB-01	SARC	MALE	54	Primary Tumor
TCGA-FX-A3NJ-01	SARC	MALE	54	Primary Tumor
TCGA-IE-A4EK-01	SARC	MALE	54	Primary Tumor
TCGA-3B-A9HT-01	SARC	MALE	53	Primary Tumor
TCGA-DX-A2J1-01	SARC	MALE	53	Primary Tumor
TCGA-FX-A3NK-01	SARC	MALE	53	Primary Tumor
TCGA-DX-A3U5-01	SARC	MALE	52	Primary Tumor
TCGA-DX-A8BX-01	SARC	MALE	52	Primary Tumor
TCGA-RN-AAAQ-01	SARC	MALE	52	Primary Tumor
TCGA-QQ-A8VG-01	SARC	MALE	52	Primary Tumor
TCGA-QQ-A5VD-01	SARC	MALE	52	Primary Tumor
TCGA-DX-AB32-01	SARC	MALE	51	Primary Tumor
TCGA-DX-A6BG-01	SARC	MALE	51	Primary Tumor
TCGA-DX-A240-01	SARC	MALE	51	Primary Tumor
TCGA-SI-A71P-01	SARC	MALE	50	Primary Tumor
TCGA-MB-A8JK-01	SARC	MALE	49	Primary Tumor
TCGA-3B-A9HY-01	SARC	MALE	49	Primary Tumor
TCGA-K1-A6RT-01	SARC	MALE	48	Primary Tumor
TCGA-SG-A6Z4-01	SARC	MALE	47	Primary Tumor
TCGA-DX-A48N-01	SARC	MALE	47	Primary Tumor
TCGA-DX-A48J-01	SARC	MALE	44	Primary Tumor
TCGA-DX-A3U8-01	SARC	MALE	43	Primary Tumor
TCGA-DX-A3LW-01	SARC	MALE	43	Primary Tumor
TCGA-IE-A3OV-01	SARC	MALE	42	Primary Tumor
TCGA-QQ-A5V2-01	SARC	MALE	42	Primary Tumor
TCGA-K1-A3PO-01	SARC	MALE	42	Primary Tumor
TCGA-DX-A48R-01	SARC	MALE	41	Primary Tumor
TCGA-Z4-A9VC-01	SARC	MALE	37	Primary Tumor
TCGA-DX-AB2G-01	SARC	MALE	36	Primary Tumor
TCGA-DX-AB2L-01	SARC	MALE	35	Primary Tumor
TCGA-DX-A6BH-01	SARC	MALE	34	Primary Tumor
TCGA-3B-A9I0-01	SARC	MALE	33	Primary Tumor
TCGA-SI-A71O-01	SARC	MALE	29	Primary Tumor
TCGA-MJ-A850-01	SARC	MALE	28	Primary Tumor
TCGA-DX-AB3C-01	SARC	MALE	27	Primary Tumor
TCGA-XK-AAIW-01	PRAD	MALE	78	Primary Tumor
TCGA-FC-A6HD-01	PRAD	MALE	77	Primary Tumor
TCGA-J4-A67Q-01	PRAD	MALE	77	Primary Tumor
TCGA-VP-A87H-01	PRAD	MALE	76	Primary Tumor
TCGA-XK-AAJT-01	PRAD	MALE	75	Primary Tumor
TCGA-XK-AAIR-01	PRAD	MALE	75	Primary Tumor
TCGA-KC-A4BR-01	PRAD	MALE	75	Primary Tumor
TCGA-HC-7210-01	PRAD	MALE	74	Primary Tumor
TCGA-FC-A66V-01	PRAD	MALE	74	Primary Tumor
TCGA-YL-A8SL-01	PRAD	MALE	74	Primary Tumor
TCGA-ZG-A9NI-01	PRAD	MALE	73	Primary Tumor
TCGA-ZG-A9KY-01	PRAD	MALE	73	Primary Tumor
TCGA-HC-7233-01	PRAD	MALE	73	Primary Tumor
TCGA-TK-A8OK-01	PRAD	MALE	73	Primary Tumor
TCGA-CH-5737-01	PRAD	MALE	73	Primary Tumor
TCGA-HC-A76W-01	PRAD	MALE	73	Primary Tumor
TCGA-ZG-A9N3-01	PRAD	MALE	73	Primary Tumor
TCGA-KK-A5A1-01	PRAD	MALE	72	Primary Tumor
TCGA-ZG-A8QW-01	PRAD	MALE	72	Primary Tumor
TCGA-CH-5738-01	PRAD	MALE	72	Primary Tumor
TCGA-CH-5750-01	PRAD	MALE	72	Primary Tumor
TCGA-HC-7820-01	PRAD	MALE	72	Primary Tumor
TCGA-G9-6364-01	PRAD	MALE	72	Primary Tumor
TCGA-CH-5768-01	PRAD	MALE	72	Primary Tumor
TCGA-CH-5791-01	PRAD	MALE	72	Primary Tumor
TCGA-ZG-A9LM-01	PRAD	MALE	72	Primary Tumor
TCGA-Y6-A9XI-01	PRAD	MALE	72	Primary Tumor
TCGA-ZG-A9LB-01	PRAD	MALE	72	Primary Tumor
TCGA-J9-A52D-01	PRAD	MALE	71	Primary Tumor
TCGA-VN-A943-01	PRAD	MALE	71	Primary Tumor
TCGA-J4-AATV-01	PRAD	MALE	71	Primary Tumor
TCGA-EJ-7218-01	PRAD	MALE	71	Primary Tumor
TCGA-G9-6365-01	PRAD	MALE	71	Primary Tumor
TCGA-EJ-7317-01	PRAD	MALE	71	Primary Tumor
TCGA-EJ-A46G-01	PRAD	MALE	71	Primary Tumor
TCGA-EJ-7782-01	PRAD	MALE	71	Primary Tumor
TCGA-ZG-A9L0-01	PRAD	MALE	71	Primary Tumor
TCGA-VP-AA1N-01	PRAD	MALE	70	Primary Tumor
TCGA-FC-A4JI-01	PRAD	MALE	70	Primary Tumor
TCGA-M7-A721-01	PRAD	MALE	70	Primary Tumor
TCGA-EJ-A6RA-01	PRAD	MALE	70	Primary Tumor
TCGA-EJ-7328-01	PRAD	MALE	70	Primary Tumor
TCGA-VP-A879-01	PRAD	MALE	70	Primary Tumor
TCGA-2A-A8VX-01	PRAD	MALE	70	Primary Tumor
TCGA-EJ-7783-01	PRAD	MALE	70	Primary Tumor
TCGA-ZG-A9L2-01	PRAD	MALE	70	Primary Tumor
TCGA-HC-A6AS-01	PRAD	MALE	70	Primary Tumor
TCGA-CH-5753-01	PRAD	MALE	70	Primary Tumor
TCGA-HC-8257-01	PRAD	MALE	70	Primary Tumor
TCGA-WW-A8ZI-01	PRAD	MALE	70	Primary Tumor
TCGA-HC-7749-01	PRAD	MALE	70	Primary Tumor
TCGA-KK-A8ID-01	PRAD	MALE	70	Primary Tumor
TCGA-KK-A8I8-01	PRAD	MALE	69	Primary Tumor
TCGA-EJ-5527-01	PRAD	MALE	69	Primary Tumor
TCGA-EJ-8474-01	PRAD	MALE	69	Primary Tumor
TCGA-ZG-A9MC-01	PRAD	MALE	69	Primary Tumor
TCGA-YL-A8SI-01	PRAD	MALE	69	Primary Tumor
TCGA-KK-A6E6-01	PRAD	MALE	69	Primary Tumor
TCGA-2A-A8W3-01	PRAD	MALE	69	Primary Tumor
TCGA-YL-A8SH-01	PRAD	MALE	69	Primary Tumor
TCGA-HC-7078-01	PRAD	MALE	69	Primary Tumor
TCGA-YL-A8SA-01	PRAD	MALE	69	Primary Tumor
TCGA-KK-A6E4-01	PRAD	MALE	69	Primary Tumor
TCGA-KK-A8IA-01	PRAD	MALE	69	Primary Tumor
TCGA-CH-5788-01	PRAD	MALE	69	Primary Tumor
TCGA-CH-5745-01	PRAD	MALE	68	Primary Tumor
TCGA-YL-A8S8-01	PRAD	MALE	68	Primary Tumor
TCGA-V1-A9ZK-01	PRAD	MALE	68	Primary Tumor
TCGA-EJ-7330-01	PRAD	MALE	68	Primary Tumor
TCGA-G9-6379-01	PRAD	MALE	68	Primary Tumor
TCGA-FC-A8O0-01	PRAD	MALE	68	Primary Tumor
TCGA-HC-A8D1-01	PRAD	MALE	68	Primary Tumor
TCGA-XA-A8JR-01	PRAD	MALE	68	Primary Tumor
TCGA-J4-A67K-01	PRAD	MALE	68	Primary Tumor
TCGA-J4-A6G1-01	PRAD	MALE	68	Primary Tumor
TCGA-V1-A9ZR-01	PRAD	MALE	68	Primary Tumor
TCGA-KK-A7B2-01	PRAD	MALE	68	Primary Tumor
TCGA-YL-A9WX-01	PRAD	MALE	68	Primary Tumor
TCGA-G9-6373-01	PRAD	MALE	68	Primary Tumor
TCGA-V1-A9ZI-01	PRAD	MALE	68	Primary Tumor
TCGA-H9-7775-01	PRAD	MALE	68	Primary Tumor
TCGA-G9-6348-01	PRAD	MALE	68	Primary Tumor
TCGA-EJ-7315-01	PRAD	MALE	68	Primary Tumor
TCGA-J4-A83J-01	PRAD	MALE	68	Primary Tumor
TCGA-EJ-5495-01	PRAD	MALE	68	Primary Tumor
TCGA-KK-A6E8-01	PRAD	MALE	68	Primary Tumor
TCGA-HC-A632-01	PRAD	MALE	68	Primary Tumor
TCGA-CH-5751-01	PRAD	MALE	68	Primary Tumor
TCGA-ZG-A9LU-01	PRAD	MALE	67	Primary Tumor
TCGA-YJ-A8SW-01	PRAD	MALE	67	Primary Tumor
TCGA-YL-A8HO-01	PRAD	MALE	67	Primary Tumor
TCGA-EJ-7791-01	PRAD	MALE	67	Primary Tumor
TCGA-EJ-5506-01	PRAD	MALE	67	Primary Tumor
TCGA-G9-6329-01	PRAD	MALE	67	Primary Tumor
TCGA-EJ-7794-01	PRAD	MALE	67	Primary Tumor
TCGA-KC-A7F3-01	PRAD	MALE	67	Primary Tumor
TCGA-KK-A7B0-01	PRAD	MALE	67	Primary Tumor
TCGA-V1-A9OQ-01	PRAD	MALE	67	Primary Tumor
TCGA-EJ-5525-01	PRAD	MALE	67	Primary Tumor
TCGA-HC-A6AN-01	PRAD	MALE	67	Primary Tumor
TCGA-HC-A631-01	PRAD	MALE	67	Primary Tumor
TCGA-EJ-A65E-01	PRAD	MALE	67	Primary Tumor
TCGA-VP-A87C-01	PRAD	MALE	67	Primary Tumor
TCGA-XQ-A8TB-01	PRAD	MALE	67	Primary Tumor
TCGA-VP-A875-01	PRAD	MALE	67	Primary Tumor
TCGA-XJ-A83F-01	PRAD	MALE	67	Primary Tumor
TCGA-ZG-A8QY-01	PRAD	MALE	67	Primary Tumor
TCGA-YL-A8SK-01	PRAD	MALE	67	Primary Tumor
TCGA-YL-A9WH-01	PRAD	MALE	67	Primary Tumor
TCGA-HC-7232-01	PRAD	MALE	66	Primary Tumor
TCGA-G9-6494-01	PRAD	MALE	66	Primary Tumor
TCGA-EJ-7789-01	PRAD	MALE	66	Primary Tumor
TCGA-EJ-5518-01	PRAD	MALE	66	Primary Tumor
TCGA-KK-A59Z-01	PRAD	MALE	66	Primary Tumor
TCGA-J4-AATZ-01	PRAD	MALE	66	Primary Tumor
TCGA-HC-8265-01	PRAD	MALE	66	Primary Tumor
TCGA-CH-5763-01	PRAD	MALE	66	Primary Tumor
TCGA-G9-7510-01	PRAD	MALE	66	Primary Tumor
TCGA-EJ-A46B-01	PRAD	MALE	66	Primary Tumor
TCGA-G9-6385-01	PRAD	MALE	66	Primary Tumor
TCGA-CH-5743-01	PRAD	MALE	66	Primary Tumor
TCGA-QU-A6IP-01	PRAD	MALE	66	Primary Tumor
TCGA-HC-7818-01	PRAD	MALE	66	Primary Tumor
TCGA-J9-A8CL-01	PRAD	MALE	66	Primary Tumor
TCGA-G9-6333-01	PRAD	MALE	66	Primary Tumor
TCGA-J9-A8CK-01	PRAD	MALE	66	Primary Tumor
TCGA-EJ-5514-01	PRAD	MALE	66	Primary Tumor
TCGA-CH-5752-01	PRAD	MALE	66	Primary Tumor
TCGA-HC-7231-01	PRAD	MALE	66	Primary Tumor
TCGA-CH-5767-01	PRAD	MALE	66	Primary Tumor
TCGA-CH-5764-01	PRAD	MALE	66	Primary Tumor
TCGA-J9-A8CP-01	PRAD	MALE	66	Primary Tumor
TCGA-EJ-A65D-01	PRAD	MALE	66	Primary Tumor
TCGA-KC-A4BV-01	PRAD	MALE	66	Primary Tumor
TCGA-YL-A8SC-01	PRAD	MALE	66	Primary Tumor
TCGA-XK-AAJP-01	PRAD	MALE	66	Primary Tumor
TCGA-HC-7080-01	PRAD	MALE	66	Primary Tumor
TCGA-J9-A8CM-01	PRAD	MALE	66	Primary Tumor
TCGA-G9-6499-01	PRAD	MALE	66	Primary Tumor
TCGA-ZG-A9LZ-01	PRAD	MALE	66	Primary Tumor
TCGA-YL-A8HM-01	PRAD	MALE	66	Primary Tumor
TCGA-ZG-A9L1-01	PRAD	MALE	66	Primary Tumor
TCGA-EJ-A8FS-01	PRAD	MALE	66	Primary Tumor
TCGA-KK-A8IB-01	PRAD	MALE	65	Primary Tumor
TCGA-J9-A52E-01	PRAD	MALE	65	Primary Tumor
TCGA-Y6-A8TL-01	PRAD	MALE	65	Primary Tumor
TCGA-V1-A8MF-01	PRAD	MALE	65	Primary Tumor
TCGA-KC-A4BL-01	PRAD	MALE	65	Primary Tumor
TCGA-EJ-5504-01	PRAD	MALE	65	Primary Tumor
TCGA-ZG-A8QZ-01	PRAD	MALE	65	Primary Tumor
TCGA-XK-AAJU-01	PRAD	MALE	65	Primary Tumor
TCGA-EJ-5508-01	PRAD	MALE	65	Primary Tumor
TCGA-J4-A67R-01	PRAD	MALE	65	Primary Tumor
TCGA-CH-5739-01	PRAD	MALE	65	Primary Tumor
TCGA-X4-A8KQ-01	PRAD	MALE	65	Primary Tumor
TCGA-KK-A7B1-01	PRAD	MALE	65	Primary Tumor
TCGA-KK-A8IL-01	PRAD	MALE	65	Primary Tumor
TCGA-CH-5794-01	PRAD	MALE	65	Primary Tumor
TCGA-EJ-7115-01	PRAD	MALE	65	Primary Tumor
TCGA-EJ-A65M-01	PRAD	MALE	65	Primary Tumor
TCGA-M7-A722-01	PRAD	MALE	65	Primary Tumor
TCGA-EJ-7781-01	PRAD	MALE	65	Primary Tumor
TCGA-CH-5754-01	PRAD	MALE	65	Primary Tumor
TCGA-V1-A9OL-01	PRAD	MALE	65	Primary Tumor
TCGA-HC-7745-01	PRAD	MALE	65	Primary Tumor
TCGA-ZG-A9M4-01	PRAD	MALE	65	Primary Tumor
TCGA-V1-A9O5-01	PRAD	MALE	64	Primary Tumor
TCGA-YL-A8SO-01	PRAD	MALE	64	Primary Tumor
TCGA-V1-A9ZG-01	PRAD	MALE	64	Primary Tumor
TCGA-CH-5790-01	PRAD	MALE	64	Primary Tumor
TCGA-EJ-A7NG-01	PRAD	MALE	64	Primary Tumor
TCGA-EJ-A8FU-01	PRAD	MALE	64	Primary Tumor
TCGA-CH-5748-01	PRAD	MALE	64	Primary Tumor
TCGA-EJ-A6RC-01	PRAD	MALE	64	Primary Tumor
TCGA-HC-A6AL-01	PRAD	MALE	64	Primary Tumor
TCGA-J4-A83M-01	PRAD	MALE	64	Primary Tumor
TCGA-G9-7525-01	PRAD	MALE	64	Primary Tumor
TCGA-ZG-A9L6-01	PRAD	MALE	64	Primary Tumor
TCGA-EJ-7331-01	PRAD	MALE	64	Primary Tumor
TCGA-G9-6363-01	PRAD	MALE	64	Primary Tumor
TCGA-M7-A724-01	PRAD	MALE	64	Primary Tumor
TCGA-ZG-A9LS-01	PRAD	MALE	64	Primary Tumor
TCGA-KK-A59V-01	PRAD	MALE	64	Primary Tumor
TCGA-V1-A8WL-01	PRAD	MALE	64	Primary Tumor
TCGA-QU-A6IL-01	PRAD	MALE	64	Primary Tumor
TCGA-EJ-A7NM-01	PRAD	MALE	64	Primary Tumor
TCGA-CH-5744-01	PRAD	MALE	64	Primary Tumor
TCGA-TP-A8TT-01	PRAD	MALE	64	Primary Tumor
TCGA-YL-A8SR-01	PRAD	MALE	64	Primary Tumor
TCGA-EJ-5519-01	PRAD	MALE	64	Primary Tumor
TCGA-KK-A7B4-01	PRAD	MALE	64	Primary Tumor
TCGA-HC-7077-01	PRAD	MALE	64	Primary Tumor
TCGA-KK-A8I4-01	PRAD	MALE	64	Primary Tumor
TCGA-HC-A9TE-01	PRAD	MALE	64	Primary Tumor
TCGA-4L-AA1F-01	PRAD	MALE	64	Primary Tumor
TCGA-EJ-5509-01	PRAD	MALE	63	Primary Tumor
TCGA-XK-AAIV-01	PRAD	MALE	63	Primary Tumor
TCGA-HC-A8CY-01	PRAD	MALE	63	Primary Tumor
TCGA-CH-5772-01	PRAD	MALE	63	Primary Tumor
TCGA-HC-7075-01	PRAD	MALE	63	Primary Tumor
TCGA-XJ-A9DK-01	PRAD	MALE	63	Primary Tumor
TCGA-V1-A8ML-01	PRAD	MALE	63	Primary Tumor
TCGA-J4-A67T-01	PRAD	MALE	63	Primary Tumor
TCGA-CH-5771-01	PRAD	MALE	63	Primary Tumor
TCGA-H9-A6BY-01	PRAD	MALE	63	Primary Tumor
TCGA-EJ-8468-01	PRAD	MALE	63	Primary Tumor
TCGA-EJ-5521-01	PRAD	MALE	63	Primary Tumor
TCGA-V1-A9Z9-01	PRAD	MALE	63	Primary Tumor
TCGA-J4-A67S-01	PRAD	MALE	63	Primary Tumor
TCGA-VP-A87B-01	PRAD	MALE	63	Primary Tumor
TCGA-KC-A7F6-01	PRAD	MALE	63	Primary Tumor
TCGA-KK-A6E5-01	PRAD	MALE	63	Primary Tumor
TCGA-KK-A7AU-01	PRAD	MALE	63	Primary Tumor
TCGA-EJ-7325-01	PRAD	MALE	63	Primary Tumor
TCGA-V1-A9OH-01	PRAD	MALE	63	Primary Tumor
TCGA-J4-A83I-01	PRAD	MALE	63	Primary Tumor
TCGA-YL-A9WK-01	PRAD	MALE	63	Primary Tumor
TCGA-EJ-7784-01	PRAD	MALE	63	Primary Tumor
TCGA-VP-A87K-01	PRAD	MALE	63	Primary Tumor
TCGA-KC-A7FA-01	PRAD	MALE	63	Primary Tumor
TCGA-YL-A9WI-01	PRAD	MALE	63	Primary Tumor
TCGA-EJ-8472-01	PRAD	MALE	63	Primary Tumor
TCGA-YL-A8S9-01	PRAD	MALE	63	Primary Tumor
TCGA-XK-AAK1-01	PRAD	MALE	62	Primary Tumor
TCGA-G9-A9S4-01	PRAD	MALE	62	Primary Tumor
TCGA-EJ-A65J-01	PRAD	MALE	62	Primary Tumor
TCGA-HC-A76X-01	PRAD	MALE	62	Primary Tumor
TCGA-KC-A7FE-01	PRAD	MALE	62	Primary Tumor
TCGA-XK-AAJA-01	PRAD	MALE	62	Primary Tumor
TCGA-KC-A7FD-01	PRAD	MALE	62	Primary Tumor
TCGA-XJ-A9DI-01	PRAD	MALE	62	Primary Tumor
TCGA-HC-7081-01	PRAD	MALE	62	Primary Tumor
TCGA-G9-6343-01	PRAD	MALE	62	Primary Tumor
TCGA-VN-A88N-01	PRAD	MALE	62	Primary Tumor
TCGA-EJ-7314-01	PRAD	MALE	62	Primary Tumor
TCGA-EJ-7786-01	PRAD	MALE	62	Primary Tumor
TCGA-KK-A7B3-01	PRAD	MALE	62	Primary Tumor
TCGA-HC-7211-01	PRAD	MALE	62	Primary Tumor
TCGA-M7-A71Z-01	PRAD	MALE	62	Primary Tumor
TCGA-EJ-5531-01	PRAD	MALE	62	Primary Tumor
TCGA-YL-A8SF-01	PRAD	MALE	62	Primary Tumor
TCGA-FC-7961-01	PRAD	MALE	62	Primary Tumor
TCGA-KK-A7AQ-01	PRAD	MALE	62	Primary Tumor
TCGA-TP-A8TV-01	PRAD	MALE	62	Primary Tumor
TCGA-J9-A52B-01	PRAD	MALE	62	Primary Tumor
TCGA-HI-7168-01	PRAD	MALE	62	Primary Tumor
TCGA-YL-A8SB-01	PRAD	MALE	62	Primary Tumor
TCGA-EJ-A7NN-01	PRAD	MALE	61	Primary Tumor
TCGA-CH-5761-01	PRAD	MALE	61	Primary Tumor
TCGA-XK-AAJR-01	PRAD	MALE	61	Primary Tumor
TCGA-G9-6366-01	PRAD	MALE	61	Primary Tumor
TCGA-EJ-AB20-01	PRAD	MALE	61	Primary Tumor
TCGA-CH-5789-01	PRAD	MALE	61	Primary Tumor
TCGA-J4-A83L-01	PRAD	MALE	61	Primary Tumor
TCGA-HC-A6AP-01	PRAD	MALE	61	Primary Tumor
TCGA-EJ-5530-01	PRAD	MALE	61	Primary Tumor
TCGA-HC-A8D0-01	PRAD	MALE	61	Primary Tumor
TCGA-EJ-7327-01	PRAD	MALE	61	Primary Tumor
TCGA-EJ-5499-01	PRAD	MALE	61	Primary Tumor
TCGA-G9-6377-01	PRAD	MALE	61	Primary Tumor
TCGA-KK-A8II-01	PRAD	MALE	61	Primary Tumor
TCGA-G9-6342-01	PRAD	MALE	61	Primary Tumor
TCGA-G9-6496-01	PRAD	MALE	61	Primary Tumor
TCGA-HC-7752-01	PRAD	MALE	61	Primary Tumor
TCGA-KK-A8I9-01	PRAD	MALE	61	Primary Tumor
TCGA-QU-A6IN-01	PRAD	MALE	61	Primary Tumor
TCGA-G9-6338-01	PRAD	MALE	61	Primary Tumor
TCGA-V1-A9OA-01	PRAD	MALE	61	Primary Tumor
TCGA-V1-A9OT-01	PRAD	MALE	61	Primary Tumor
TCGA-G9-6361-01	PRAD	MALE	61	Primary Tumor
TCGA-ZG-A9L4-01	PRAD	MALE	61	Primary Tumor
TCGA-J4-A67N-01	PRAD	MALE	61	Primary Tumor
TCGA-X4-A8KS-01	PRAD	MALE	61	Primary Tumor
TCGA-YL-A8SQ-01	PRAD	MALE	61	Primary Tumor
TCGA-SU-A7E7-01	PRAD	MALE	60	Primary Tumor
TCGA-ZG-A9LY-01	PRAD	MALE	60	Primary Tumor
TCGA-CH-5762-01	PRAD	MALE	60	Primary Tumor
TCGA-EJ-5515-01	PRAD	MALE	60	Primary Tumor
TCGA-V1-A9O7-01	PRAD	MALE	60	Primary Tumor
TCGA-EJ-5542-01	PRAD	MALE	60	Primary Tumor
TCGA-H9-A6BX-01	PRAD	MALE	60	Primary Tumor
TCGA-EJ-A46H-01	PRAD	MALE	60	Primary Tumor
TCGA-VN-A88Q-01	PRAD	MALE	60	Primary Tumor
TCGA-G9-6367-01	PRAD	MALE	60	Primary Tumor
TCGA-HC-A6AQ-01	PRAD	MALE	60	Primary Tumor
TCGA-G9-6356-01	PRAD	MALE	60	Primary Tumor
TCGA-KK-A7AY-01	PRAD	MALE	60	Primary Tumor
TCGA-HC-8264-01	PRAD	MALE	60	Primary Tumor
TCGA-HC-7209-01	PRAD	MALE	60	Primary Tumor
TCGA-HC-7748-01	PRAD	MALE	60	Primary Tumor
TCGA-VN-A88P-01	PRAD	MALE	60	Primary Tumor
TCGA-V1-A8MM-01	PRAD	MALE	60	Primary Tumor
TCGA-YL-A8SJ-01	PRAD	MALE	60	Primary Tumor
TCGA-VP-A872-01	PRAD	MALE	60	Primary Tumor
TCGA-ZG-A9L9-01	PRAD	MALE	60	Primary Tumor
TCGA-HC-7736-01	PRAD	MALE	59	Primary Tumor
TCGA-V1-A9Z8-01	PRAD	MALE	59	Primary Tumor
TCGA-EJ-A65F-01	PRAD	MALE	59	Primary Tumor
TCGA-QU-A6IM-01	PRAD	MALE	59	Primary Tumor
TCGA-VN-A88I-01	PRAD	MALE	59	Primary Tumor
TCGA-EJ-A7NJ-01	PRAD	MALE	59	Primary Tumor
TCGA-EJ-A8FP-01	PRAD	MALE	59	Primary Tumor
TCGA-G9-6347-01	PRAD	MALE	59	Primary Tumor
TCGA-HC-7740-01	PRAD	MALE	59	Primary Tumor
TCGA-J4-AAU2-01	PRAD	MALE	59	Primary Tumor
TCGA-VP-A87E-01	PRAD	MALE	59	Primary Tumor
TCGA-J4-A67O-01	PRAD	MALE	59	Primary Tumor
TCGA-EJ-7123-01	PRAD	MALE	59	Primary Tumor
TCGA-EJ-5496-01	PRAD	MALE	59	Primary Tumor
TCGA-KK-A8IJ-01	PRAD	MALE	59	Primary Tumor
TCGA-YL-A8HK-01	PRAD	MALE	59	Primary Tumor
TCGA-MG-AAMC-01	PRAD	MALE	59	Primary Tumor
TCGA-V1-A8WW-01	PRAD	MALE	59	Primary Tumor
TCGA-KK-A6E0-01	PRAD	MALE	59	Primary Tumor
TCGA-XQ-A8TA-01	PRAD	MALE	59	Primary Tumor
TCGA-YL-A9WL-01	PRAD	MALE	59	Primary Tumor
TCGA-EJ-7312-01	PRAD	MALE	58	Primary Tumor
TCGA-YL-A8SP-01	PRAD	MALE	58	Primary Tumor
TCGA-EJ-A8FN-01	PRAD	MALE	58	Primary Tumor
TCGA-EJ-A7NK-01	PRAD	MALE	58	Primary Tumor
TCGA-G9-6371-01	PRAD	MALE	58	Primary Tumor
TCGA-G9-6353-01	PRAD	MALE	58	Primary Tumor
TCGA-YL-A8HJ-01	PRAD	MALE	58	Primary Tumor
TCGA-KK-A7AV-01	PRAD	MALE	58	Primary Tumor
TCGA-V1-A8MJ-01	PRAD	MALE	58	Primary Tumor
TCGA-G9-7519-01	PRAD	MALE	58	Primary Tumor
TCGA-HC-7738-01	PRAD	MALE	58	Primary Tumor
TCGA-HC-7742-01	PRAD	MALE	58	Primary Tumor
TCGA-HI-7170-01	PRAD	MALE	58	Primary Tumor
TCGA-G9-6339-01	PRAD	MALE	58	Primary Tumor
TCGA-VP-A878-01	PRAD	MALE	58	Primary Tumor
TCGA-EJ-8470-01	PRAD	MALE	58	Primary Tumor
TCGA-KK-A8I6-01	PRAD	MALE	58	Primary Tumor
TCGA-HC-A9TH-01	PRAD	MALE	58	Primary Tumor
TCGA-YL-A8HL-01	PRAD	MALE	58	Primary Tumor
TCGA-VN-A88K-01	PRAD	MALE	58	Primary Tumor
TCGA-HC-8216-01	PRAD	MALE	58	Primary Tumor
TCGA-ZG-A9L5-01	PRAD	MALE	58	Primary Tumor
TCGA-J9-A52C-01	PRAD	MALE	57	Primary Tumor
TCGA-KK-A8IF-01	PRAD	MALE	57	Primary Tumor
TCGA-CH-5792-01	PRAD	MALE	57	Primary Tumor
TCGA-V1-A9OY-01	PRAD	MALE	57	Primary Tumor
TCGA-J4-A6G3-01	PRAD	MALE	57	Primary Tumor
TCGA-ZG-A9LN-01	PRAD	MALE	57	Primary Tumor
TCGA-EJ-A46F-01	PRAD	MALE	57	Primary Tumor
TCGA-EJ-5532-01	PRAD	MALE	57	Primary Tumor
TCGA-EJ-A65G-01	PRAD	MALE	57	Primary Tumor
TCGA-EJ-A46E-01	PRAD	MALE	57	Primary Tumor
TCGA-CH-5746-01	PRAD	MALE	57	Primary Tumor
TCGA-2A-AAYF-01	PRAD	MALE	57	Primary Tumor
TCGA-G9-6336-01	PRAD	MALE	57	Primary Tumor
TCGA-EJ-A46I-01	PRAD	MALE	57	Primary Tumor
TCGA-EJ-5505-01	PRAD	MALE	57	Primary Tumor
TCGA-2A-A8VO-01	PRAD	MALE	57	Primary Tumor
TCGA-G9-6362-01	PRAD	MALE	57	Primary Tumor
TCGA-2A-AAYO-01	PRAD	MALE	57	Primary Tumor
TCGA-J4-A83N-01	PRAD	MALE	57	Primary Tumor
TCGA-EJ-7321-01	PRAD	MALE	57	Primary Tumor
TCGA-KK-A7AW-01	PRAD	MALE	57	Primary Tumor
TCGA-HC-8262-01	PRAD	MALE	57	Primary Tumor
TCGA-CH-5740-01	PRAD	MALE	57	Primary Tumor
TCGA-EJ-5524-01	PRAD	MALE	57	Primary Tumor
TCGA-XJ-A83H-01	PRAD	MALE	57	Primary Tumor
TCGA-YL-A9WY-01	PRAD	MALE	57	Primary Tumor
TCGA-KK-A6E1-01	PRAD	MALE	57	Primary Tumor
TCGA-XK-AAJ3-01	PRAD	MALE	56	Primary Tumor
TCGA-HC-7212-01	PRAD	MALE	56	Primary Tumor
TCGA-KK-A59Y-01	PRAD	MALE	56	Primary Tumor
TCGA-KK-A8IK-01	PRAD	MALE	56	Primary Tumor
TCGA-KK-A6E3-01	PRAD	MALE	56	Primary Tumor
TCGA-EJ-5526-01	PRAD	MALE	56	Primary Tumor
TCGA-HC-8258-01	PRAD	MALE	56	Primary Tumor
TCGA-KK-A7AZ-01	PRAD	MALE	56	Primary Tumor
TCGA-EJ-5498-01	PRAD	MALE	56	Primary Tumor
TCGA-V1-A8WS-01	PRAD	MALE	56	Primary Tumor
TCGA-V1-A9OX-01	PRAD	MALE	56	Primary Tumor
TCGA-EJ-A7NF-01	PRAD	MALE	56	Primary Tumor
TCGA-ZG-A8QX-01	PRAD	MALE	56	Primary Tumor
TCGA-V1-A8MU-01	PRAD	MALE	56	Primary Tumor
TCGA-HC-A4ZV-01	PRAD	MALE	56	Primary Tumor
TCGA-EJ-A7NH-01	PRAD	MALE	56	Primary Tumor
TCGA-CH-5741-01	PRAD	MALE	56	Primary Tumor
TCGA-2A-AAYU-01	PRAD	MALE	56	Primary Tumor
TCGA-M7-A725-01	PRAD	MALE	56	Primary Tumor
TCGA-VP-A87J-01	PRAD	MALE	56	Primary Tumor
TCGA-V1-A9O9-01	PRAD	MALE	56	Primary Tumor
TCGA-HI-7171-01	PRAD	MALE	56	Primary Tumor
TCGA-KK-A7AP-01	PRAD	MALE	55	Primary Tumor
TCGA-KK-A59X-01	PRAD	MALE	55	Primary Tumor
TCGA-EJ-A65B-01	PRAD	MALE	55	Primary Tumor
TCGA-KK-A8I5-01	PRAD	MALE	55	Primary Tumor
TCGA-HC-A6HX-01	PRAD	MALE	55	Primary Tumor
TCGA-KC-A4BO-01	PRAD	MALE	55	Primary Tumor
TCGA-KC-A4BN-01	PRAD	MALE	55	Primary Tumor
TCGA-HI-7169-01	PRAD	MALE	55	Primary Tumor
TCGA-KK-A8I7-01	PRAD	MALE	55	Primary Tumor
TCGA-HC-8266-01	PRAD	MALE	55	Primary Tumor
TCGA-VN-A88M-01	PRAD	MALE	55	Primary Tumor
TCGA-KK-A8IM-01	PRAD	MALE	55	Primary Tumor
TCGA-M7-A71Y-01	PRAD	MALE	55	Primary Tumor
TCGA-HC-7737-01	PRAD	MALE	55	Primary Tumor
TCGA-G9-A9S7-01	PRAD	MALE	55	Primary Tumor
TCGA-EJ-5517-01	PRAD	MALE	55	Primary Tumor
TCGA-EJ-5501-01	PRAD	MALE	55	Primary Tumor
TCGA-G9-6354-01	PRAD	MALE	55	Primary Tumor
TCGA-CH-5765-01	PRAD	MALE	55	Primary Tumor
TCGA-G9-6332-01	PRAD	MALE	55	Primary Tumor
TCGA-CH-5766-01	PRAD	MALE	55	Primary Tumor
TCGA-G9-6369-01	PRAD	MALE	55	Primary Tumor
TCGA-J4-A67M-01	PRAD	MALE	55	Primary Tumor
TCGA-KK-A8IG-01	PRAD	MALE	55	Primary Tumor
TCGA-ZG-A9ND-01	PRAD	MALE	55	Primary Tumor
TCGA-EJ-5511-01	PRAD	MALE	55	Primary Tumor
TCGA-KC-A7F5-01	PRAD	MALE	54	Primary Tumor
TCGA-EJ-7785-01	PRAD	MALE	54	Primary Tumor
TCGA-J4-A67L-01	PRAD	MALE	54	Primary Tumor
TCGA-M7-A723-01	PRAD	MALE	54	Primary Tumor
TCGA-G9-6378-01	PRAD	MALE	54	Primary Tumor
TCGA-KK-A6E2-01	PRAD	MALE	54	Primary Tumor
TCGA-VN-A88L-01	PRAD	MALE	54	Primary Tumor
TCGA-KK-A8IC-01	PRAD	MALE	54	Primary Tumor
TCGA-VP-A87D-01	PRAD	MALE	54	Primary Tumor
TCGA-V1-A9Z7-01	PRAD	MALE	54	Primary Tumor
TCGA-2A-A8W1-01	PRAD	MALE	54	Primary Tumor
TCGA-HC-7821-01	PRAD	MALE	54	Primary Tumor
TCGA-EJ-5507-01	PRAD	MALE	54	Primary Tumor
TCGA-V1-A8MG-01	PRAD	MALE	53	Primary Tumor
TCGA-EJ-7792-01	PRAD	MALE	53	Primary Tumor
TCGA-J4-A6M7-01	PRAD	MALE	53	Primary Tumor
TCGA-M7-A720-01	PRAD	MALE	53	Primary Tumor
TCGA-G9-6498-01	PRAD	MALE	53	Primary Tumor
TCGA-HC-8256-01	PRAD	MALE	53	Primary Tumor
TCGA-EJ-7797-01	PRAD	MALE	53	Primary Tumor
TCGA-EJ-A46D-01	PRAD	MALE	53	Primary Tumor
TCGA-FC-A5OB-01	PRAD	MALE	53	Primary Tumor
TCGA-QU-A6IO-01	PRAD	MALE	53	Primary Tumor
TCGA-J9-A8CN-01	PRAD	MALE	53	Primary Tumor
TCGA-G9-6384-01	PRAD	MALE	53	Primary Tumor
TCGA-EJ-7788-01	PRAD	MALE	53	Primary Tumor
TCGA-HC-7819-01	PRAD	MALE	53	Primary Tumor
TCGA-G9-A9S0-01	PRAD	MALE	53	Primary Tumor
TCGA-VN-A88R-01	PRAD	MALE	53	Primary Tumor
TCGA-HC-7213-01	PRAD	MALE	53	Primary Tumor
TCGA-J4-A83K-01	PRAD	MALE	52	Primary Tumor
TCGA-G9-6370-01	PRAD	MALE	52	Primary Tumor
TCGA-2A-A8VV-01	PRAD	MALE	52	Primary Tumor
TCGA-HC-7817-01	PRAD	MALE	52	Primary Tumor
TCGA-FC-7708-01	PRAD	MALE	52	Primary Tumor
TCGA-HC-A6AO-01	PRAD	MALE	52	Primary Tumor
TCGA-HC-7747-01	PRAD	MALE	52	Primary Tumor
TCGA-G9-7521-01	PRAD	MALE	52	Primary Tumor
TCGA-V1-A8WV-01	PRAD	MALE	52	Primary Tumor
TCGA-XJ-A9DX-01	PRAD	MALE	51	Primary Tumor
TCGA-EJ-5522-01	PRAD	MALE	51	Primary Tumor
TCGA-HC-7079-01	PRAD	MALE	51	Primary Tumor
TCGA-EJ-AB27-01	PRAD	MALE	51	Primary Tumor
TCGA-EJ-A8FO-01	PRAD	MALE	51	Primary Tumor
TCGA-EJ-7318-01	PRAD	MALE	51	Primary Tumor
TCGA-2A-A8VL-01	PRAD	MALE	51	Primary Tumor
TCGA-G9-6351-01	PRAD	MALE	51	Primary Tumor
TCGA-HC-A6HY-01	PRAD	MALE	51	Primary Tumor
TCGA-V1-A8X3-01	PRAD	MALE	51	Primary Tumor
TCGA-XJ-A83G-01	PRAD	MALE	51	Primary Tumor
TCGA-EJ-5503-01	PRAD	MALE	50	Primary Tumor
TCGA-EJ-5494-01	PRAD	MALE	50	Primary Tumor
TCGA-HC-7750-01	PRAD	MALE	50	Primary Tumor
TCGA-EJ-5502-01	PRAD	MALE	50	Primary Tumor
TCGA-HC-8259-01	PRAD	MALE	50	Primary Tumor
TCGA-KK-A6DY-01	PRAD	MALE	50	Primary Tumor
TCGA-HC-7230-01	PRAD	MALE	50	Primary Tumor
TCGA-KK-A8IH-01	PRAD	MALE	50	Primary Tumor
TCGA-G9-7522-01	PRAD	MALE	49	Primary Tumor
TCGA-J4-8198-01	PRAD	MALE	49	Primary Tumor
TCGA-EJ-7793-01	PRAD	MALE	49	Primary Tumor
TCGA-V1-A9OF-01	PRAD	MALE	49	Primary Tumor
TCGA-EJ-5516-01	PRAD	MALE	49	Primary Tumor
TCGA-VN-A88O-01	PRAD	MALE	49	Primary Tumor
TCGA-CH-5769-01	PRAD	MALE	48	Primary Tumor
TCGA-HC-8213-01	PRAD	MALE	48	Primary Tumor
TCGA-EJ-5510-01	PRAD	MALE	48	Primary Tumor
TCGA-XJ-A9DQ-01	PRAD	MALE	48	Primary Tumor
TCGA-G9-7509-01	PRAD	MALE	48	Primary Tumor
TCGA-HC-8261-01	PRAD	MALE	48	Primary Tumor
TCGA-J4-8200-01	PRAD	MALE	47	Primary Tumor
TCGA-EJ-5497-01	PRAD	MALE	47	Primary Tumor
TCGA-YL-A9WJ-01	PRAD	MALE	47	Primary Tumor
TCGA-V1-A8WN-01	PRAD	MALE	47	Primary Tumor
TCGA-2A-A8VT-01	PRAD	MALE	47	Primary Tumor
TCGA-HC-A48F-01	PRAD	MALE	47	Primary Tumor
TCGA-EJ-8469-01	PRAD	MALE	46	Primary Tumor
TCGA-EJ-5512-01	PRAD	MALE	46	Primary Tumor
TCGA-HC-7744-01	PRAD	MALE	46	Primary Tumor
TCGA-KK-A6E7-01	PRAD	MALE	46	Primary Tumor
TCGA-VP-A876-01	PRAD	MALE	46	Primary Tumor
TCGA-EJ-7125-01	PRAD	MALE	44	Primary Tumor
TCGA-G9-7523-01	PRAD	MALE	44	Primary Tumor
TCGA-HC-8260-01	PRAD	MALE	43	Primary Tumor
TCGA-V1-A8MK-01	PRAD	MALE	41	Primary Tumor
TCGA-55-8204-01	LUAD	FEMALE	87	Primary Tumor
TCGA-NJ-A4YI-01	LUAD	FEMALE	87	Primary Tumor
TCGA-50-5935-01	LUAD	FEMALE	86	Primary Tumor
TCGA-44-6777-01	LUAD	FEMALE	85	Primary Tumor
TCGA-50-6673-01	LUAD	FEMALE	84	Primary Tumor
TCGA-67-3773-01	LUAD	FEMALE	84	Primary Tumor
TCGA-97-7554-01	LUAD	FEMALE	83	Primary Tumor
TCGA-67-3772-01	LUAD	FEMALE	82	Primary Tumor
TCGA-73-7499-01	LUAD	FEMALE	81	Primary Tumor
TCGA-91-6835-01	LUAD	FEMALE	81	Primary Tumor
TCGA-55-A491-01	LUAD	FEMALE	81	Primary Tumor
TCGA-49-6743-01	LUAD	FEMALE	81	Primary Tumor
TCGA-62-8395-01	LUAD	FEMALE	80	Primary Tumor
TCGA-73-4658-01	LUAD	FEMALE	80	Primary Tumor
TCGA-55-A57B-01	LUAD	FEMALE	80	Primary Tumor
TCGA-50-6594-01	LUAD	FEMALE	79	Primary Tumor
TCGA-49-4514-01	LUAD	FEMALE	79	Primary Tumor
TCGA-05-4250-01	LUAD	FEMALE	79	Primary Tumor
TCGA-50-5055-01	LUAD	FEMALE	79	Primary Tumor
TCGA-55-6982-01	LUAD	FEMALE	79	Primary Tumor
TCGA-50-6597-01	LUAD	FEMALE	79	Primary Tumor
TCGA-86-A456-01	LUAD	FEMALE	78	Primary Tumor
TCGA-62-A46V-01	LUAD	FEMALE	78	Primary Tumor
TCGA-97-8547-01	LUAD	FEMALE	78	Primary Tumor
TCGA-44-A47A-01	LUAD	FEMALE	78	Primary Tumor
TCGA-J2-A4AE-01	LUAD	FEMALE	77	Primary Tumor
TCGA-44-3398-01	LUAD	FEMALE	77	Primary Tumor
TCGA-55-8513-01	LUAD	FEMALE	77	Primary Tumor
TCGA-78-8655-01	LUAD	FEMALE	77	Primary Tumor
TCGA-67-3771-01	LUAD	FEMALE	77	Primary Tumor
TCGA-64-1677-01	LUAD	FEMALE	77	Primary Tumor
TCGA-55-7283-01	LUAD	FEMALE	76	Primary Tumor
TCGA-53-7626-01	LUAD	FEMALE	76	Primary Tumor
TCGA-97-7938-01	LUAD	FEMALE	76	Primary Tumor
TCGA-NJ-A55A-01	LUAD	FEMALE	76	Primary Tumor
TCGA-93-7347-01	LUAD	FEMALE	76	Primary Tumor
TCGA-97-7546-01	LUAD	FEMALE	76	Primary Tumor
TCGA-55-7724-01	LUAD	FEMALE	76	Primary Tumor
TCGA-MP-A5C7-01	LUAD	FEMALE	76	Primary Tumor
TCGA-55-8205-01	LUAD	FEMALE	76	Primary Tumor
TCGA-MP-A4T6-01	LUAD	FEMALE	76	Primary Tumor
TCGA-91-8499-01	LUAD	FEMALE	76	Primary Tumor
TCGA-38-4630-01	LUAD	FEMALE	75	Primary Tumor
TCGA-50-5931-01	LUAD	FEMALE	75	Primary Tumor
TCGA-91-8497-01	LUAD	FEMALE	75	Primary Tumor
TCGA-91-6849-01	LUAD	FEMALE	75	Primary Tumor
TCGA-MP-A4T7-01	LUAD	FEMALE	75	Primary Tumor
TCGA-97-8172-01	LUAD	FEMALE	75	Primary Tumor
TCGA-55-8621-01	LUAD	FEMALE	75	Primary Tumor
TCGA-MP-A4TA-01	LUAD	FEMALE	75	Primary Tumor
TCGA-93-7348-01	LUAD	FEMALE	75	Primary Tumor
TCGA-78-7539-01	LUAD	FEMALE	75	Primary Tumor
TCGA-55-1595-01	LUAD	FEMALE	74	Primary Tumor
TCGA-49-4488-01	LUAD	FEMALE	74	Primary Tumor
TCGA-95-A4VK-01	LUAD	FEMALE	74	Primary Tumor
TCGA-05-4405-01	LUAD	FEMALE	74	Primary Tumor
TCGA-44-3396-01	LUAD	FEMALE	74	Primary Tumor
TCGA-44-2657-01	LUAD	FEMALE	74	Primary Tumor
TCGA-50-6595-01	LUAD	FEMALE	74	Primary Tumor
TCGA-99-8033-01	LUAD	FEMALE	74	Primary Tumor
TCGA-55-6986-01	LUAD	FEMALE	74	Primary Tumor
TCGA-99-7458-01	LUAD	FEMALE	74	Primary Tumor
TCGA-O1-A52J-01	LUAD	FEMALE	74	Primary Tumor
TCGA-55-7995-01	LUAD	FEMALE	73	Primary Tumor
TCGA-44-A47G-01	LUAD	FEMALE	73	Primary Tumor
TCGA-55-8208-01	LUAD	FEMALE	73	Primary Tumor
TCGA-67-3774-01	LUAD	FEMALE	73	Primary Tumor
TCGA-49-4507-01	LUAD	FEMALE	73	Primary Tumor
TCGA-67-6217-01	LUAD	FEMALE	73	Primary Tumor
TCGA-44-A479-01	LUAD	FEMALE	73	Primary Tumor
TCGA-55-8511-01	LUAD	FEMALE	73	Primary Tumor
TCGA-86-6851-01	LUAD	FEMALE	73	Primary Tumor
TCGA-62-8402-01	LUAD	FEMALE	73	Primary Tumor
TCGA-44-6775-01	LUAD	FEMALE	72	Primary Tumor
TCGA-38-4631-01	LUAD	FEMALE	72	Primary Tumor
TCGA-49-4487-01	LUAD	FEMALE	72	Primary Tumor
TCGA-50-5044-01	LUAD	FEMALE	72	Primary Tumor
TCGA-50-6590-01	LUAD	FEMALE	72	Primary Tumor
TCGA-38-7271-01	LUAD	FEMALE	72	Primary Tumor
TCGA-55-7573-01	LUAD	FEMALE	72	Primary Tumor
TCGA-55-7726-01	LUAD	FEMALE	72	Primary Tumor
TCGA-97-7941-01	LUAD	FEMALE	72	Primary Tumor
TCGA-86-8671-01	LUAD	FEMALE	72	Primary Tumor
TCGA-55-8619-01	LUAD	FEMALE	72	Primary Tumor
TCGA-99-8025-01	LUAD	FEMALE	72	Primary Tumor
TCGA-50-6592-01	LUAD	FEMALE	71	Primary Tumor
TCGA-62-A46U-01	LUAD	FEMALE	71	Primary Tumor
TCGA-55-6984-01	LUAD	FEMALE	71	Primary Tumor
TCGA-44-3919-01	LUAD	FEMALE	71	Primary Tumor
TCGA-55-7914-01	LUAD	FEMALE	71	Primary Tumor
TCGA-69-7979-01	LUAD	FEMALE	71	Primary Tumor
TCGA-78-7146-01	LUAD	FEMALE	71	Primary Tumor
TCGA-69-7980-01	LUAD	FEMALE	70	Primary Tumor
TCGA-62-8397-01	LUAD	FEMALE	70	Primary Tumor
TCGA-64-1678-01	LUAD	FEMALE	70	Primary Tumor
TCGA-MP-A4TH-01	LUAD	FEMALE	70	Primary Tumor
TCGA-55-A492-01	LUAD	FEMALE	70	Primary Tumor
TCGA-55-7911-01	LUAD	FEMALE	70	Primary Tumor
TCGA-99-AA5R-01	LUAD	FEMALE	70	Primary Tumor
TCGA-55-7281-01	LUAD	FEMALE	70	Primary Tumor
TCGA-62-A46Y-01	LUAD	FEMALE	70	Primary Tumor
TCGA-67-3770-01	LUAD	FEMALE	70	Primary Tumor
TCGA-38-6178-01	LUAD	FEMALE	70	Primary Tumor
TCGA-55-8514-01	LUAD	FEMALE	70	Primary Tumor
TCGA-05-4425-01	LUAD	FEMALE	70	Primary Tumor
TCGA-44-2661-01	LUAD	FEMALE	69	Primary Tumor
TCGA-86-7953-01	LUAD	FEMALE	69	Primary Tumor
TCGA-J2-8194-01	LUAD	FEMALE	69	Primary Tumor
TCGA-50-5944-01	LUAD	FEMALE	69	Primary Tumor
TCGA-55-8203-01	LUAD	FEMALE	69	Primary Tumor
TCGA-44-7661-01	LUAD	FEMALE	69	Primary Tumor
TCGA-49-4512-01	LUAD	FEMALE	69	Primary Tumor
TCGA-73-4670-01	LUAD	FEMALE	69	Primary Tumor
TCGA-NJ-A4YQ-01	LUAD	FEMALE	69	Primary Tumor
TCGA-78-7161-01	LUAD	FEMALE	69	Primary Tumor
TCGA-05-5715-01	LUAD	FEMALE	69	Primary Tumor
TCGA-97-A4M3-01	LUAD	FEMALE	69	Primary Tumor
TCGA-49-6761-01	LUAD	FEMALE	68	Primary Tumor
TCGA-49-4506-01	LUAD	FEMALE	68	Primary Tumor
TCGA-MP-A4T4-01	LUAD	FEMALE	68	Primary Tumor
TCGA-55-7725-01	LUAD	FEMALE	68	Primary Tumor
TCGA-86-7954-01	LUAD	FEMALE	68	Primary Tumor
TCGA-S2-AA1A-01	LUAD	FEMALE	68	Primary Tumor
TCGA-44-6147-01	LUAD	FEMALE	67	Primary Tumor
TCGA-55-6970-01	LUAD	FEMALE	67	Primary Tumor
TCGA-97-7547-01	LUAD	FEMALE	67	Primary Tumor
TCGA-05-4434-01	LUAD	FEMALE	67	Primary Tumor
TCGA-44-A4SU-01	LUAD	FEMALE	67	Primary Tumor
TCGA-50-5942-01	LUAD	FEMALE	67	Primary Tumor
TCGA-55-8096-01	LUAD	FEMALE	67	Primary Tumor
TCGA-49-4501-01	LUAD	FEMALE	67	Primary Tumor
TCGA-78-7147-01	LUAD	FEMALE	67	Primary Tumor
TCGA-38-4625-01	LUAD	FEMALE	66	Primary Tumor
TCGA-86-8075-01	LUAD	FEMALE	66	Primary Tumor
TCGA-J2-A4AG-01	LUAD	FEMALE	66	Primary Tumor
TCGA-95-A4VP-01	LUAD	FEMALE	66	Primary Tumor
TCGA-78-7540-01	LUAD	FEMALE	66	Primary Tumor
TCGA-73-4668-01	LUAD	FEMALE	66	Primary Tumor
TCGA-05-4427-01	LUAD	FEMALE	65	Primary Tumor
TCGA-73-4662-01	LUAD	FEMALE	65	Primary Tumor
TCGA-38-4628-01	LUAD	FEMALE	65	Primary Tumor
TCGA-44-2655-01	LUAD	FEMALE	65	Primary Tumor
TCGA-78-7153-01	LUAD	FEMALE	65	Primary Tumor
TCGA-J2-8192-01	LUAD	FEMALE	65	Primary Tumor
TCGA-91-6830-01	LUAD	FEMALE	65	Primary Tumor
TCGA-62-A46O-01	LUAD	FEMALE	65	Primary Tumor
TCGA-44-2659-01	LUAD	FEMALE	65	Primary Tumor
TCGA-62-8394-01	LUAD	FEMALE	65	Primary Tumor
TCGA-55-7728-01	LUAD	FEMALE	64	Primary Tumor
TCGA-49-6744-01	LUAD	FEMALE	64	Primary Tumor
TCGA-L9-A8F4-01	LUAD	FEMALE	64	Primary Tumor
TCGA-38-4627-01	LUAD	FEMALE	64	Primary Tumor
TCGA-55-7574-01	LUAD	FEMALE	64	Primary Tumor
TCGA-50-6591-01	LUAD	FEMALE	63	Primary Tumor
TCGA-L9-A443-01	LUAD	FEMALE	63	Primary Tumor
TCGA-49-AAQV-01	LUAD	FEMALE	63	Primary Tumor
TCGA-91-8496-01	LUAD	FEMALE	63	Primary Tumor
TCGA-50-8457-01	LUAD	FEMALE	63	Primary Tumor
TCGA-55-A48X-01	LUAD	FEMALE	63	Primary Tumor
TCGA-86-A4P7-01	LUAD	FEMALE	63	Primary Tumor
TCGA-86-8056-01	LUAD	FEMALE	63	Primary Tumor
TCGA-86-8278-01	LUAD	FEMALE	63	Primary Tumor
TCGA-95-7043-01	LUAD	FEMALE	63	Primary Tumor
TCGA-86-8074-01	LUAD	FEMALE	62	Primary Tumor
TCGA-95-A4VN-01	LUAD	FEMALE	62	Primary Tumor
TCGA-91-6847-01	LUAD	FEMALE	62	Primary Tumor
TCGA-78-7143-01	LUAD	FEMALE	62	Primary Tumor
TCGA-44-6145-01	LUAD	FEMALE	62	Primary Tumor
TCGA-MP-A4TJ-01	LUAD	FEMALE	62	Primary Tumor
TCGA-55-8506-01	LUAD	FEMALE	62	Primary Tumor
TCGA-44-5645-01	LUAD	FEMALE	61	Primary Tumor
TCGA-64-1681-01	LUAD	FEMALE	61	Primary Tumor
TCGA-55-7913-01	LUAD	FEMALE	61	Primary Tumor
TCGA-86-8668-01	LUAD	FEMALE	61	Primary Tumor
TCGA-49-4505-01	LUAD	FEMALE	61	Primary Tumor
TCGA-55-8299-01	LUAD	FEMALE	61	Primary Tumor
TCGA-86-7714-01	LUAD	FEMALE	61	Primary Tumor
TCGA-55-A494-01	LUAD	FEMALE	61	Primary Tumor
TCGA-J2-A4AD-01	LUAD	FEMALE	61	Primary Tumor
TCGA-44-4112-01	LUAD	FEMALE	60	Primary Tumor
TCGA-44-3918-01	LUAD	FEMALE	60	Primary Tumor
TCGA-71-8520-01	LUAD	FEMALE	60	Primary Tumor
TCGA-78-7159-01	LUAD	FEMALE	60	Primary Tumor
TCGA-55-A48Z-01	LUAD	FEMALE	60	Primary Tumor
TCGA-L9-A444-01	LUAD	FEMALE	60	Primary Tumor
TCGA-55-8508-01	LUAD	FEMALE	60	Primary Tumor
TCGA-55-8097-01	LUAD	FEMALE	60	Primary Tumor
TCGA-97-A4M0-01	LUAD	FEMALE	60	Primary Tumor
TCGA-44-6776-01	LUAD	FEMALE	60	Primary Tumor
TCGA-69-A59K-01	LUAD	FEMALE	60	Primary Tumor
TCGA-55-6543-01	LUAD	FEMALE	60	Primary Tumor
TCGA-05-4430-01	LUAD	FEMALE	59	Primary Tumor
TCGA-69-8253-01	LUAD	FEMALE	59	Primary Tumor
TCGA-55-6971-01	LUAD	FEMALE	59	Primary Tumor
TCGA-86-A4P8-01	LUAD	FEMALE	59	Primary Tumor
TCGA-78-7158-01	LUAD	FEMALE	59	Primary Tumor
TCGA-55-8087-01	LUAD	FEMALE	59	Primary Tumor
TCGA-83-5908-01	LUAD	FEMALE	59	Primary Tumor
TCGA-55-6979-01	LUAD	FEMALE	59	Primary Tumor
TCGA-50-5068-01	LUAD	FEMALE	59	Primary Tumor
TCGA-97-8177-01	LUAD	FEMALE	59	Primary Tumor
TCGA-91-6840-01	LUAD	FEMALE	59	Primary Tumor
TCGA-05-4390-01	LUAD	FEMALE	58	Primary Tumor
TCGA-MP-A4TF-01	LUAD	FEMALE	58	Primary Tumor
TCGA-64-1679-01	LUAD	FEMALE	58	Primary Tumor
TCGA-78-8648-01	LUAD	FEMALE	58	Primary Tumor
TCGA-73-7498-01	LUAD	FEMALE	58	Primary Tumor
TCGA-55-6985-01	LUAD	FEMALE	58	Primary Tumor
TCGA-97-7553-01	LUAD	FEMALE	58	Primary Tumor
TCGA-55-8616-01	LUAD	FEMALE	58	Primary Tumor
TCGA-38-4626-01	LUAD	FEMALE	57	Primary Tumor
TCGA-50-5045-01	LUAD	FEMALE	57	Primary Tumor
TCGA-67-6216-01	LUAD	FEMALE	57	Primary Tumor
TCGA-05-4402-01	LUAD	FEMALE	57	Primary Tumor
TCGA-49-AARN-01	LUAD	FEMALE	56	Primary Tumor
TCGA-MP-A4TK-01	LUAD	FEMALE	56	Primary Tumor
TCGA-NJ-A55O-01	LUAD	FEMALE	56	Primary Tumor
TCGA-44-6774-01	LUAD	FEMALE	56	Primary Tumor
TCGA-44-2665-01	LUAD	FEMALE	55	Primary Tumor
TCGA-97-8552-01	LUAD	FEMALE	55	Primary Tumor
TCGA-50-5941-01	LUAD	FEMALE	55	Primary Tumor
TCGA-64-5781-01	LUAD	FEMALE	55	Primary Tumor
TCGA-97-8175-01	LUAD	FEMALE	55	Primary Tumor
TCGA-55-8510-01	LUAD	FEMALE	55	Primary Tumor
TCGA-55-A493-01	LUAD	FEMALE	54	Primary Tumor
TCGA-MP-A4T9-01	LUAD	FEMALE	54	Primary Tumor
TCGA-62-A46R-01	LUAD	FEMALE	54	Primary Tumor
TCGA-86-8280-01	LUAD	FEMALE	54	Primary Tumor
TCGA-95-7039-01	LUAD	FEMALE	54	Primary Tumor
TCGA-69-7974-01	LUAD	FEMALE	54	Primary Tumor
TCGA-44-8117-01	LUAD	FEMALE	54	Primary Tumor
TCGA-78-7220-01	LUAD	FEMALE	53	Primary Tumor
TCGA-55-6981-01	LUAD	FEMALE	53	Primary Tumor
TCGA-78-8662-01	LUAD	FEMALE	53	Primary Tumor
TCGA-78-7145-01	LUAD	FEMALE	52	Primary Tumor
TCGA-4B-A93V-01	LUAD	FEMALE	52	Primary Tumor
TCGA-44-7672-01	LUAD	FEMALE	52	Primary Tumor
TCGA-91-6836-01	LUAD	FEMALE	52	Primary Tumor
TCGA-97-A4M1-01	LUAD	FEMALE	52	Primary Tumor
TCGA-73-4666-01	LUAD	FEMALE	52	Primary Tumor
TCGA-67-6215-01	LUAD	FEMALE	52	Primary Tumor
TCGA-49-4510-01	LUAD	FEMALE	51	Primary Tumor
TCGA-05-4417-01	LUAD	FEMALE	51	Primary Tumor
TCGA-49-AARE-01	LUAD	FEMALE	51	Primary Tumor
TCGA-53-7813-01	LUAD	FEMALE	51	Primary Tumor
TCGA-44-5644-01	LUAD	FEMALE	51	Primary Tumor
TCGA-99-8028-01	LUAD	FEMALE	50	Primary Tumor
TCGA-44-6779-01	LUAD	FEMALE	50	Primary Tumor
TCGA-NJ-A4YF-01	LUAD	FEMALE	50	Primary Tumor
TCGA-55-7910-01	LUAD	FEMALE	50	Primary Tumor
TCGA-55-7816-01	LUAD	FEMALE	49	Primary Tumor
TCGA-44-7667-01	LUAD	FEMALE	49	Primary Tumor
TCGA-50-6593-01	LUAD	FEMALE	49	Primary Tumor
TCGA-L4-A4E5-01	LUAD	FEMALE	48	Primary Tumor
TCGA-71-6725-01	LUAD	FEMALE	48	Primary Tumor
TCGA-05-4398-01	LUAD	FEMALE	47	Primary Tumor
TCGA-44-7670-01	LUAD	FEMALE	47	Primary Tumor
TCGA-49-6767-01	LUAD	FEMALE	46	Primary Tumor
TCGA-49-4490-01	LUAD	FEMALE	45	Primary Tumor
TCGA-97-A4M6-01	LUAD	FEMALE	45	Primary Tumor
TCGA-50-5051-01	LUAD	FEMALE	42	Primary Tumor
TCGA-95-7948-01	LUAD	FEMALE	42	Primary Tumor
TCGA-69-7973-01	LUAD	FEMALE	42	Primary Tumor
TCGA-49-AARQ-01	LUAD	FEMALE	41	Primary Tumor
TCGA-L9-A5IP-01	LUAD	FEMALE	40	Primary Tumor
TCGA-53-7624-01	LUAD	FEMALE	40	Primary Tumor
TCGA-49-AARO-01	LUAD	FEMALE	39	Primary Tumor
TCGA-44-3917-01	LUAD	FEMALE	33	Primary Tumor
TCGA-75-6214-01	LUAD	FEMALE		Primary Tumor
TCGA-80-5608-01	LUAD	FEMALE		Primary Tumor
TCGA-75-5147-01	LUAD	FEMALE		Primary Tumor
TCGA-75-5126-01	LUAD	FEMALE		Primary Tumor
TCGA-80-5607-01	LUAD	FEMALE		Primary Tumor
TCGA-75-7031-01	LUAD	FEMALE		Primary Tumor
TCGA-75-6205-01	LUAD	FEMALE		Primary Tumor
TCGA-75-6212-01	LUAD	FEMALE		Primary Tumor
TCGA-75-6203-01	LUAD	FEMALE		Primary Tumor
TCGA-75-6211-01	LUAD	FEMALE		Primary Tumor
TCGA-55-A4DF-01	LUAD	MALE	88	Primary Tumor
TCGA-69-8254-01	LUAD	MALE	85	Primary Tumor
TCGA-50-5939-01	LUAD	MALE	85	Primary Tumor
TCGA-62-A470-01	LUAD	MALE	84	Primary Tumor
TCGA-69-7761-01	LUAD	MALE	84	Primary Tumor
TCGA-78-7166-01	LUAD	MALE	84	Primary Tumor
TCGA-97-A4M5-01	LUAD	MALE	83	Primary Tumor
TCGA-05-4433-01	LUAD	MALE	82	Primary Tumor
TCGA-49-6745-01	LUAD	MALE	82	Primary Tumor
TCGA-97-8171-01	LUAD	MALE	81	Primary Tumor
TCGA-97-A4LX-01	LUAD	MALE	81	Primary Tumor
TCGA-55-6983-01	LUAD	MALE	81	Primary Tumor
TCGA-55-6978-01	LUAD	MALE	81	Primary Tumor
TCGA-55-7994-01	LUAD	MALE	81	Primary Tumor
TCGA-38-A44F-01	LUAD	MALE	80	Primary Tumor
TCGA-55-8090-01	LUAD	MALE	80	Primary Tumor
TCGA-86-8055-01	LUAD	MALE	79	Primary Tumor
TCGA-44-A47B-01	LUAD	MALE	79	Primary Tumor
TCGA-55-A490-01	LUAD	MALE	78	Primary Tumor
TCGA-91-A4BD-01	LUAD	MALE	78	Primary Tumor
TCGA-91-6829-01	LUAD	MALE	78	Primary Tumor
TCGA-55-7227-01	LUAD	MALE	77	Primary Tumor
TCGA-93-8067-01	LUAD	MALE	77	Primary Tumor
TCGA-69-8453-01	LUAD	MALE	77	Primary Tumor
TCGA-55-7907-01	LUAD	MALE	77	Primary Tumor
TCGA-55-6987-01	LUAD	MALE	77	Primary Tumor
TCGA-49-4494-01	LUAD	MALE	77	Primary Tumor
TCGA-78-7167-01	LUAD	MALE	77	Primary Tumor
TCGA-MP-A4TC-01	LUAD	MALE	77	Primary Tumor
TCGA-55-7815-01	LUAD	MALE	76	Primary Tumor
TCGA-05-4395-01	LUAD	MALE	76	Primary Tumor
TCGA-05-4403-01	LUAD	MALE	76	Primary Tumor
TCGA-55-8614-01	LUAD	MALE	76	Primary Tumor
TCGA-05-4396-01	LUAD	MALE	76	Primary Tumor
TCGA-69-7764-01	LUAD	MALE	75	Primary Tumor
TCGA-78-7162-01	LUAD	MALE	75	Primary Tumor
TCGA-86-8281-01	LUAD	MALE	75	Primary Tumor
TCGA-L9-A50W-01	LUAD	MALE	75	Primary Tumor
TCGA-55-8092-01	LUAD	MALE	75	Primary Tumor
TCGA-50-5932-01	LUAD	MALE	75	Primary Tumor
TCGA-44-A47F-01	LUAD	MALE	74	Primary Tumor
TCGA-64-5815-01	LUAD	MALE	74	Primary Tumor
TCGA-50-5072-01	LUAD	MALE	74	Primary Tumor
TCGA-55-7284-01	LUAD	MALE	74	Primary Tumor
TCGA-73-4677-01	LUAD	MALE	74	Primary Tumor
TCGA-55-8091-01	LUAD	MALE	74	Primary Tumor
TCGA-50-8460-01	LUAD	MALE	74	Primary Tumor
TCGA-97-A4M7-01	LUAD	MALE	74	Primary Tumor
TCGA-62-A46S-01	LUAD	MALE	73	Primary Tumor
TCGA-44-A4SS-01	LUAD	MALE	73	Primary Tumor
TCGA-69-7760-01	LUAD	MALE	73	Primary Tumor
TCGA-55-8207-01	LUAD	MALE	73	Primary Tumor
TCGA-44-8119-01	LUAD	MALE	73	Primary Tumor
TCGA-97-8179-01	LUAD	MALE	72	Primary Tumor
TCGA-95-8039-01	LUAD	MALE	72	Primary Tumor
TCGA-55-6972-01	LUAD	MALE	72	Primary Tumor
TCGA-50-5066-01	LUAD	MALE	72	Primary Tumor
TCGA-49-4486-01	LUAD	MALE	72	Primary Tumor
TCGA-MP-A4TI-01	LUAD	MALE	72	Primary Tumor
TCGA-78-7537-01	LUAD	MALE	72	Primary Tumor
TCGA-78-7154-01	LUAD	MALE	72	Primary Tumor
TCGA-50-5933-01	LUAD	MALE	72	Primary Tumor
TCGA-44-7660-01	LUAD	MALE	72	Primary Tumor
TCGA-MP-A4T2-01	LUAD	MALE	71	Primary Tumor
TCGA-78-7148-01	LUAD	MALE	71	Primary Tumor
TCGA-93-A4JN-01	LUAD	MALE	71	Primary Tumor
TCGA-95-7944-01	LUAD	MALE	71	Primary Tumor
TCGA-MP-A4TD-01	LUAD	MALE	71	Primary Tumor
TCGA-78-7149-01	LUAD	MALE	71	Primary Tumor
TCGA-05-4426-01	LUAD	MALE	71	Primary Tumor
TCGA-69-8255-01	LUAD	MALE	71	Primary Tumor
TCGA-95-7562-01	LUAD	MALE	71	Primary Tumor
TCGA-55-6712-01	LUAD	MALE	71	Primary Tumor
TCGA-55-A4DG-01	LUAD	MALE	71	Primary Tumor
TCGA-64-5775-01	LUAD	MALE	71	Primary Tumor
TCGA-05-4244-01	LUAD	MALE	70	Primary Tumor
TCGA-05-4389-01	LUAD	MALE	70	Primary Tumor
TCGA-86-7713-01	LUAD	MALE	70	Primary Tumor
TCGA-62-A472-01	LUAD	MALE	70	Primary Tumor
TCGA-55-7727-01	LUAD	MALE	70	Primary Tumor
TCGA-91-6828-01	LUAD	MALE	70	Primary Tumor
TCGA-44-7659-01	LUAD	MALE	70	Primary Tumor
TCGA-05-4424-01	LUAD	MALE	70	Primary Tumor
TCGA-50-5049-01	LUAD	MALE	70	Primary Tumor
TCGA-49-6742-01	LUAD	MALE	70	Primary Tumor
TCGA-97-7552-01	LUAD	MALE	70	Primary Tumor
TCGA-86-7711-01	LUAD	MALE	70	Primary Tumor
TCGA-93-A4JO-01	LUAD	MALE	70	Primary Tumor
TCGA-69-7763-01	LUAD	MALE	69	Primary Tumor
TCGA-35-4122-01	LUAD	MALE	69	Primary Tumor
TCGA-05-4418-01	LUAD	MALE	69	Primary Tumor
TCGA-67-4679-01	LUAD	MALE	69	Primary Tumor
TCGA-78-8660-01	LUAD	MALE	69	Primary Tumor
TCGA-55-A48Y-01	LUAD	MALE	69	Primary Tumor
TCGA-L9-A7SV-01	LUAD	MALE	69	Primary Tumor
TCGA-49-AAR3-01	LUAD	MALE	69	Primary Tumor
TCGA-78-7536-01	LUAD	MALE	69	Primary Tumor
TCGA-38-4629-01	LUAD	MALE	68	Primary Tumor
TCGA-MP-A4T8-01	LUAD	MALE	68	Primary Tumor
TCGA-49-AARR-01	LUAD	MALE	68	Primary Tumor
TCGA-50-8459-01	LUAD	MALE	68	Primary Tumor
TCGA-05-4382-01	LUAD	MALE	68	Primary Tumor
TCGA-05-5425-01	LUAD	MALE	68	Primary Tumor
TCGA-05-4422-01	LUAD	MALE	68	Primary Tumor
TCGA-55-1594-01	LUAD	MALE	68	Primary Tumor
TCGA-78-7155-01	LUAD	MALE	68	Primary Tumor
TCGA-05-5420-01	LUAD	MALE	67	Primary Tumor
TCGA-55-8615-01	LUAD	MALE	67	Primary Tumor
TCGA-97-8174-01	LUAD	MALE	67	Primary Tumor
TCGA-78-7633-01	LUAD	MALE	67	Primary Tumor
TCGA-NJ-A55R-01	LUAD	MALE	67	Primary Tumor
TCGA-L4-A4E6-01	LUAD	MALE	67	Primary Tumor
TCGA-95-8494-01	LUAD	MALE	67	Primary Tumor
TCGA-95-7947-01	LUAD	MALE	67	Primary Tumor
TCGA-MP-A4SV-01	LUAD	MALE	67	Primary Tumor
TCGA-05-4249-01	LUAD	MALE	67	Primary Tumor
TCGA-05-4384-01	LUAD	MALE	66	Primary Tumor
TCGA-97-A4M2-01	LUAD	MALE	66	Primary Tumor
TCGA-73-4659-01	LUAD	MALE	66	Primary Tumor
TCGA-86-7701-01	LUAD	MALE	66	Primary Tumor
TCGA-91-6831-01	LUAD	MALE	66	Primary Tumor
TCGA-05-4432-01	LUAD	MALE	66	Primary Tumor
TCGA-44-2662-01	LUAD	MALE	65	Primary Tumor
TCGA-62-A46P-01	LUAD	MALE	65	Primary Tumor
TCGA-NJ-A4YG-01	LUAD	MALE	65	Primary Tumor
TCGA-05-4397-01	LUAD	MALE	65	Primary Tumor
TCGA-78-7152-01	LUAD	MALE	65	Primary Tumor
TCGA-97-7937-01	LUAD	MALE	65	Primary Tumor
TCGA-05-5423-01	LUAD	MALE	65	Primary Tumor
TCGA-55-1592-01	LUAD	MALE	65	Primary Tumor
TCGA-44-6146-01	LUAD	MALE	64	Primary Tumor
TCGA-49-AAR2-01	LUAD	MALE	64	Primary Tumor
TCGA-55-8085-01	LUAD	MALE	64	Primary Tumor
TCGA-86-8669-01	LUAD	MALE	64	Primary Tumor
TCGA-44-7671-01	LUAD	MALE	64	Primary Tumor
TCGA-55-7903-01	LUAD	MALE	64	Primary Tumor
TCGA-93-A4JP-01	LUAD	MALE	64	Primary Tumor
TCGA-62-A471-01	LUAD	MALE	64	Primary Tumor
TCGA-MN-A4N5-01	LUAD	MALE	63	Primary Tumor
TCGA-64-1680-01	LUAD	MALE	63	Primary Tumor
TCGA-97-8176-01	LUAD	MALE	63	Primary Tumor
TCGA-53-A4EZ-01	LUAD	MALE	63	Primary Tumor
TCGA-55-6642-01	LUAD	MALE	63	Primary Tumor
TCGA-50-5946-01	LUAD	MALE	62	Primary Tumor
TCGA-78-7156-01	LUAD	MALE	62	Primary Tumor
TCGA-91-7771-01	LUAD	MALE	62	Primary Tumor
TCGA-55-8505-01	LUAD	MALE	62	Primary Tumor
TCGA-05-4410-01	LUAD	MALE	62	Primary Tumor
TCGA-62-8399-01	LUAD	MALE	62	Primary Tumor
TCGA-86-7955-01	LUAD	MALE	62	Primary Tumor
TCGA-35-5375-01	LUAD	MALE	61	Primary Tumor
TCGA-86-8054-01	LUAD	MALE	61	Primary Tumor
TCGA-86-8673-01	LUAD	MALE	61	Primary Tumor
TCGA-78-7160-01	LUAD	MALE	61	Primary Tumor
TCGA-MP-A4SY-01	LUAD	MALE	61	Primary Tumor
TCGA-55-6975-01	LUAD	MALE	61	Primary Tumor
TCGA-49-AAR9-01	LUAD	MALE	61	Primary Tumor
TCGA-99-8032-01	LUAD	MALE	61	Primary Tumor
TCGA-95-7567-01	LUAD	MALE	61	Primary Tumor
TCGA-55-6968-01	LUAD	MALE	61	Primary Tumor
TCGA-64-5779-01	LUAD	MALE	61	Primary Tumor
TCGA-44-7662-01	LUAD	MALE	61	Primary Tumor
TCGA-64-5778-01	LUAD	MALE	60	Primary Tumor
TCGA-64-5774-01	LUAD	MALE	60	Primary Tumor
TCGA-MN-A4N1-01	LUAD	MALE	60	Primary Tumor
TCGA-55-8620-01	LUAD	MALE	60	Primary Tumor
TCGA-44-6148-01	LUAD	MALE	60	Primary Tumor
TCGA-55-7570-01	LUAD	MALE	60	Primary Tumor
TCGA-50-7109-01	LUAD	MALE	60	Primary Tumor
TCGA-05-5429-01	LUAD	MALE	60	Primary Tumor
TCGA-78-7163-01	LUAD	MALE	60	Primary Tumor
TCGA-44-2656-01	LUAD	MALE	59	Primary Tumor
TCGA-73-4675-01	LUAD	MALE	59	Primary Tumor
TCGA-78-8640-01	LUAD	MALE	59	Primary Tumor
TCGA-69-7978-01	LUAD	MALE	59	Primary Tumor
TCGA-86-8672-01	LUAD	MALE	59	Primary Tumor
TCGA-44-6778-01	LUAD	MALE	59	Primary Tumor
TCGA-78-7150-01	LUAD	MALE	59	Primary Tumor
TCGA-91-6848-01	LUAD	MALE	59	Primary Tumor
TCGA-44-7669-01	LUAD	MALE	59	Primary Tumor
TCGA-91-A4BC-01	LUAD	MALE	59	Primary Tumor
TCGA-50-5936-01	LUAD	MALE	58	Primary Tumor
TCGA-86-8073-01	LUAD	MALE	58	Primary Tumor
TCGA-55-8301-01	LUAD	MALE	58	Primary Tumor
TCGA-55-5899-01	LUAD	MALE	58	Primary Tumor
TCGA-44-6144-01	LUAD	MALE	58	Primary Tumor
TCGA-44-8120-01	LUAD	MALE	58	Primary Tumor
TCGA-64-1676-01	LUAD	MALE	58	Primary Tumor
TCGA-05-4415-01	LUAD	MALE	57	Primary Tumor
TCGA-86-8585-01	LUAD	MALE	57	Primary Tumor
TCGA-35-3615-01	LUAD	MALE	57	Primary Tumor
TCGA-05-5428-01	LUAD	MALE	57	Primary Tumor
TCGA-49-AAR0-01	LUAD	MALE	57	Primary Tumor
TCGA-MN-A4N4-01	LUAD	MALE	57	Primary Tumor
TCGA-MP-A4TE-01	LUAD	MALE	56	Primary Tumor
TCGA-86-A4JF-01	LUAD	MALE	56	Primary Tumor
TCGA-55-8206-01	LUAD	MALE	56	Primary Tumor
TCGA-78-7542-01	LUAD	MALE	56	Primary Tumor
TCGA-L9-A743-01	LUAD	MALE	56	Primary Tumor
TCGA-69-7765-01	LUAD	MALE	56	Primary Tumor
TCGA-55-6980-01	LUAD	MALE	56	Primary Tumor
TCGA-55-8089-01	LUAD	MALE	56	Primary Tumor
TCGA-62-8398-01	LUAD	MALE	55	Primary Tumor
TCGA-55-1596-01	LUAD	MALE	55	Primary Tumor
TCGA-55-8302-01	LUAD	MALE	54	Primary Tumor
TCGA-55-7576-01	LUAD	MALE	54	Primary Tumor
TCGA-44-5643-01	LUAD	MALE	53	Primary Tumor
TCGA-MP-A4SW-01	LUAD	MALE	53	Primary Tumor
TCGA-55-8507-01	LUAD	MALE	53	Primary Tumor
TCGA-NJ-A4YP-01	LUAD	MALE	52	Primary Tumor
TCGA-86-6562-01	LUAD	MALE	52	Primary Tumor
TCGA-55-6969-01	LUAD	MALE	52	Primary Tumor
TCGA-86-8359-01	LUAD	MALE	52	Primary Tumor
TCGA-44-2668-01	LUAD	MALE	51	Primary Tumor
TCGA-55-8094-01	LUAD	MALE	51	Primary Tumor
TCGA-49-AAR4-01	LUAD	MALE	51	Primary Tumor
TCGA-86-8674-01	LUAD	MALE	50	Primary Tumor
TCGA-93-A4JQ-01	LUAD	MALE	49	Primary Tumor
TCGA-NJ-A7XG-01	LUAD	MALE	49	Primary Tumor
TCGA-86-A4D0-01	LUAD	MALE	48	Primary Tumor
TCGA-50-5930-01	LUAD	MALE	47	Primary Tumor
TCGA-86-8279-01	LUAD	MALE	46	Primary Tumor
TCGA-73-4676-01	LUAD	MALE	45	Primary Tumor
TCGA-78-7535-01	LUAD	MALE	45	Primary Tumor
TCGA-86-8358-01	LUAD	MALE	44	Primary Tumor
TCGA-44-2666-01	LUAD	MALE	43	Primary Tumor
TCGA-38-4632-01	LUAD	MALE	42	Primary Tumor
TCGA-86-8076-01	LUAD	MALE	42	Primary Tumor
TCGA-55-8512-01	LUAD	MALE	41	Primary Tumor
TCGA-05-4420-01	LUAD	MALE	41	Primary Tumor
TCGA-73-A9RS-01	LUAD	MALE	41	Primary Tumor
TCGA-35-4123-01	LUAD	MALE	38	Primary Tumor
TCGA-75-7025-01	LUAD	MALE		Primary Tumor
TCGA-75-6206-01	LUAD	MALE		Primary Tumor
TCGA-75-7030-01	LUAD	MALE		Primary Tumor
TCGA-75-7027-01	LUAD	MALE		Primary Tumor
TCGA-75-6207-01	LUAD	MALE		Primary Tumor
TCGA-75-5122-01	LUAD	MALE		Primary Tumor
TCGA-80-5611-01	LUAD	MALE		Primary Tumor
TCGA-75-5146-01	LUAD	MALE		Primary Tumor
TCGA-75-5125-01	LUAD	MALE		Primary Tumor
TCGA-LL-A6FP-01	BRCA	FEMALE	90	Primary Tumor
TCGA-E2-A9RU-01	BRCA	FEMALE	90	Primary Tumor
TCGA-C8-A26Y-01	BRCA	FEMALE	90	Primary Tumor
TCGA-D8-A1JK-01	BRCA	FEMALE	90	Primary Tumor
TCGA-BH-A1F8-01	BRCA	FEMALE	90	Primary Tumor
TCGA-A2-A25D-01	BRCA	FEMALE	90	Primary Tumor
TCGA-AC-A3W6-01	BRCA	FEMALE	90	Primary Tumor
TCGA-B6-A0IC-01	BRCA	FEMALE	90	Primary Tumor
TCGA-AC-A23H-01	BRCA	FEMALE	90	Primary Tumor
TCGA-E2-A15O-01	BRCA	FEMALE	89	Primary Tumor
TCGA-A8-A08A-01	BRCA	FEMALE	89	Primary Tumor
TCGA-A8-A08L-01	BRCA	FEMALE	89	Primary Tumor
TCGA-LL-A5YM-01	BRCA	FEMALE	88	Primary Tumor
TCGA-BH-A18N-01	BRCA	FEMALE	88	Primary Tumor
TCGA-AC-A5EI-01	BRCA	FEMALE	88	Primary Tumor
TCGA-BH-A1FG-01	BRCA	FEMALE	88	Primary Tumor
TCGA-D8-A73U-01	BRCA	FEMALE	88	Primary Tumor
TCGA-AN-A0FK-01	BRCA	FEMALE	88	Primary Tumor
TCGA-BH-A8FY-01	BRCA	FEMALE	87	Primary Tumor
TCGA-AC-A2FM-01	BRCA	FEMALE	87	Primary Tumor
TCGA-AC-A3HN-01	BRCA	FEMALE	87	Primary Tumor
TCGA-D8-A1XG-01	BRCA	FEMALE	86	Primary Tumor
TCGA-A8-A07Z-01	BRCA	FEMALE	85	Primary Tumor
TCGA-A2-A0CO-01	BRCA	FEMALE	85	Primary Tumor
TCGA-E9-A54X-01	BRCA	FEMALE	85	Primary Tumor
TCGA-D8-A1XC-01	BRCA	FEMALE	85	Primary Tumor
TCGA-A2-A1G1-01	BRCA	FEMALE	85	Primary Tumor
TCGA-A8-A06Z-01	BRCA	FEMALE	84	Primary Tumor
TCGA-A8-A0A1-01	BRCA	FEMALE	84	Primary Tumor
TCGA-A7-A56D-01	BRCA	FEMALE	84	Primary Tumor
TCGA-AQ-A1H2-01	BRCA	FEMALE	84	Primary Tumor
TCGA-A8-A09I-01	BRCA	FEMALE	84	Primary Tumor
TCGA-AC-A2B8-01	BRCA	FEMALE	84	Primary Tumor
TCGA-LL-A50Y-01	BRCA	FEMALE	84	Primary Tumor
TCGA-D8-A1XV-01	BRCA	FEMALE	84	Primary Tumor
TCGA-E2-A1LK-01	BRCA	FEMALE	84	Primary Tumor
TCGA-AR-A1AJ-01	BRCA	FEMALE	83	Primary Tumor
TCGA-BH-A1EU-01	BRCA	FEMALE	83	Primary Tumor
TCGA-A8-A09Z-01	BRCA	FEMALE	83	Primary Tumor
TCGA-A8-A0AD-01	BRCA	FEMALE	83	Primary Tumor
TCGA-A8-A09Q-01	BRCA	FEMALE	83	Primary Tumor
TCGA-S3-AA12-01	BRCA	FEMALE	82	Primary Tumor
TCGA-A8-A09R-01	BRCA	FEMALE	82	Primary Tumor
TCGA-BH-A0WA-01	BRCA	FEMALE	82	Primary Tumor
TCGA-C8-A131-01	BRCA	FEMALE	82	Primary Tumor
TCGA-BH-A0H6-01	BRCA	FEMALE	82	Primary Tumor
TCGA-A2-A0SW-01	BRCA	FEMALE	82	Primary Tumor
TCGA-A8-A084-01	BRCA	FEMALE	81	Primary Tumor
TCGA-BH-A0HK-01	BRCA	FEMALE	81	Primary Tumor
TCGA-A8-A07E-01	BRCA	FEMALE	81	Primary Tumor
TCGA-D8-A1XZ-01	BRCA	FEMALE	81	Primary Tumor
TCGA-B6-A0IH-01	BRCA	FEMALE	81	Primary Tumor
TCGA-BH-A18G-01	BRCA	FEMALE	81	Primary Tumor
TCGA-D8-A1X5-01	BRCA	FEMALE	81	Primary Tumor
TCGA-E2-A1IH-01	BRCA	FEMALE	80	Primary Tumor
TCGA-A8-A0A9-01	BRCA	FEMALE	80	Primary Tumor
TCGA-OL-A66J-01	BRCA	FEMALE	80	Primary Tumor
TCGA-EW-A1IW-01	BRCA	FEMALE	80	Primary Tumor
TCGA-D8-A1X6-01	BRCA	FEMALE	80	Primary Tumor
TCGA-BH-A204-01	BRCA	FEMALE	80	Primary Tumor
TCGA-A8-A081-01	BRCA	FEMALE	80	Primary Tumor
TCGA-D8-A145-01	BRCA	FEMALE	80	Primary Tumor
TCGA-A8-A06U-01	BRCA	FEMALE	80	Primary Tumor
TCGA-A2-A0EV-01	BRCA	FEMALE	80	Primary Tumor
TCGA-C8-A12K-01	BRCA	FEMALE	80	Primary Tumor
TCGA-BH-A42U-01	BRCA	FEMALE	80	Primary Tumor
TCGA-AR-A1AP-01	BRCA	FEMALE	80	Primary Tumor
TCGA-D8-A1Y1-01	BRCA	FEMALE	80	Primary Tumor
TCGA-BH-A1F0-01	BRCA	FEMALE	80	Primary Tumor
TCGA-D8-A1JN-01	BRCA	FEMALE	80	Primary Tumor
TCGA-A8-A07R-01	BRCA	FEMALE	80	Primary Tumor
TCGA-E2-A105-01	BRCA	FEMALE	79	Primary Tumor
TCGA-AC-A2FG-01	BRCA	FEMALE	79	Primary Tumor
TCGA-AN-A0AJ-01	BRCA	FEMALE	79	Primary Tumor
TCGA-BH-A1EY-01	BRCA	FEMALE	79	Primary Tumor
TCGA-E2-A14P-01	BRCA	FEMALE	79	Primary Tumor
TCGA-BH-A0E7-01	BRCA	FEMALE	79	Primary Tumor
TCGA-A7-A0CH-01	BRCA	FEMALE	79	Primary Tumor
TCGA-A7-A13G-01	BRCA	FEMALE	79	Primary Tumor
TCGA-AC-A3QP-01	BRCA	FEMALE	79	Primary Tumor
TCGA-A7-A3RF-01	BRCA	FEMALE	79	Primary Tumor
TCGA-BH-A18S-01	BRCA	FEMALE	79	Primary Tumor
TCGA-LD-A74U-01	BRCA	FEMALE	79	Primary Tumor
TCGA-D8-A73W-01	BRCA	FEMALE	79	Primary Tumor
TCGA-AC-A3EH-01	BRCA	FEMALE	79	Primary Tumor
TCGA-A8-A09G-01	BRCA	FEMALE	79	Primary Tumor
TCGA-D8-A1JF-01	BRCA	FEMALE	79	Primary Tumor
TCGA-AC-A62Y-01	BRCA	FEMALE	79	Primary Tumor
TCGA-A2-A0EU-01	BRCA	FEMALE	79	Primary Tumor
TCGA-BH-A1EN-01	BRCA	FEMALE	78	Primary Tumor
TCGA-AO-A1KT-01	BRCA	FEMALE	78	Primary Tumor
TCGA-BH-A0BV-01	BRCA	FEMALE	78	Primary Tumor
TCGA-AC-A2BK-01	BRCA	FEMALE	78	Primary Tumor
TCGA-E2-A2P5-01	BRCA	FEMALE	78	Primary Tumor
TCGA-BH-A1FC-01	BRCA	FEMALE	78	Primary Tumor
TCGA-C8-A12Q-01	BRCA	FEMALE	78	Primary Tumor
TCGA-E9-A3Q9-01	BRCA	FEMALE	78	Primary Tumor
TCGA-BH-A0HI-01	BRCA	FEMALE	78	Primary Tumor
TCGA-A7-A0CG-01	BRCA	FEMALE	78	Primary Tumor
TCGA-E2-A1IL-01	BRCA	FEMALE	78	Primary Tumor
TCGA-BH-A203-01	BRCA	FEMALE	78	Primary Tumor
TCGA-BH-A0DO-01	BRCA	FEMALE	78	Primary Tumor
TCGA-BH-A0HF-01	BRCA	FEMALE	77	Primary Tumor
TCGA-LL-A6FQ-01	BRCA	FEMALE	77	Primary Tumor
TCGA-E2-A2P6-01	BRCA	FEMALE	77	Primary Tumor
TCGA-D8-A1J8-01	BRCA	FEMALE	77	Primary Tumor
TCGA-EW-A1P5-01	BRCA	FEMALE	77	Primary Tumor
TCGA-A8-A06X-01	BRCA	FEMALE	77	Primary Tumor
TCGA-BH-A0W5-01	BRCA	FEMALE	77	Primary Tumor
TCGA-A2-A4S0-01	BRCA	FEMALE	77	Primary Tumor
TCGA-D8-A1JS-01	BRCA	FEMALE	77	Primary Tumor
TCGA-AO-A1KP-01	BRCA	FEMALE	77	Primary Tumor
TCGA-WT-AB44-01	BRCA	FEMALE	77	Primary Tumor
TCGA-BH-A209-01	BRCA	FEMALE	77	Primary Tumor
TCGA-B6-A40B-01	BRCA	FEMALE	76	Primary Tumor
TCGA-BH-A0BP-01	BRCA	FEMALE	76	Primary Tumor
TCGA-A8-A07W-01	BRCA	FEMALE	76	Primary Tumor
TCGA-AC-A2QI-01	BRCA	FEMALE	76	Primary Tumor
TCGA-AN-A0AK-01	BRCA	FEMALE	76	Primary Tumor
TCGA-E2-A14O-01	BRCA	FEMALE	76	Primary Tumor
TCGA-E2-A15G-01	BRCA	FEMALE	76	Primary Tumor
TCGA-AC-A23G-01	BRCA	FEMALE	76	Primary Tumor
TCGA-A8-A08Z-01	BRCA	FEMALE	76	Primary Tumor
TCGA-A8-A099-01	BRCA	FEMALE	76	Primary Tumor
TCGA-A2-A0D1-01	BRCA	FEMALE	76	Primary Tumor
TCGA-D8-A1XJ-01	BRCA	FEMALE	76	Primary Tumor
TCGA-AC-A5EH-01	BRCA	FEMALE	76	Primary Tumor
TCGA-B6-A0IM-01	BRCA	FEMALE	75	Primary Tumor
TCGA-A8-A09M-01	BRCA	FEMALE	75	Primary Tumor
TCGA-D8-A27G-01	BRCA	FEMALE	75	Primary Tumor
TCGA-BH-A42T-01	BRCA	FEMALE	75	Primary Tumor
TCGA-AO-A12G-01	BRCA	FEMALE	75	Primary Tumor
TCGA-EW-A423-01	BRCA	FEMALE	75	Primary Tumor
TCGA-A8-A06T-01	BRCA	FEMALE	75	Primary Tumor
TCGA-A8-A094-01	BRCA	FEMALE	75	Primary Tumor
TCGA-OL-A66P-01	BRCA	FEMALE	75	Primary Tumor
TCGA-AC-A3TN-01	BRCA	FEMALE	75	Primary Tumor
TCGA-V7-A7HQ-01	BRCA	FEMALE	75	Primary Tumor
TCGA-AC-A8OR-01	BRCA	FEMALE	75	Primary Tumor
TCGA-E9-A1ND-01	BRCA	FEMALE	75	Primary Tumor
TCGA-A2-A1FV-01	BRCA	FEMALE	74	Primary Tumor
TCGA-AC-A5XU-01	BRCA	FEMALE	74	Primary Tumor
TCGA-AN-A03X-01	BRCA	FEMALE	74	Primary Tumor
TCGA-E9-A1RE-01	BRCA	FEMALE	74	Primary Tumor
TCGA-AC-A3YI-01	BRCA	FEMALE	74	Primary Tumor
TCGA-C8-A1HM-01	BRCA	FEMALE	74	Primary Tumor
TCGA-E2-A14U-01	BRCA	FEMALE	74	Primary Tumor
TCGA-E2-A1IF-01	BRCA	FEMALE	74	Primary Tumor
TCGA-E2-A1B4-01	BRCA	FEMALE	74	Primary Tumor
TCGA-B6-A0IP-01	BRCA	FEMALE	74	Primary Tumor
TCGA-AC-A5XS-01	BRCA	FEMALE	74	Primary Tumor
TCGA-E9-A22A-01	BRCA	FEMALE	74	Primary Tumor
TCGA-D8-A1XY-01	BRCA	FEMALE	74	Primary Tumor
TCGA-A8-A090-01	BRCA	FEMALE	74	Primary Tumor
TCGA-D8-A142-01	BRCA	FEMALE	74	Primary Tumor
TCGA-A8-A09E-01	BRCA	FEMALE	73	Primary Tumor
[truncated: 941 more rows]
