# Supplementary material for: Replication collisions induced by de-repressed S-phase transcription are connected with malignant transformation of adult stem cells
Source: Nat Commun. 2022 Nov 14;13:6907. doi: 10.1038/s41467-022-34577-y (PMC9663592; doi:10.1038/s41467-022-34577-y)
Supplement: Supplementary file 6 — Supplementary Data 3 [file 41467_2022_34577_MOESM6_ESM.xlsx]

## Sheet: Supplementary Data 3
													Supplementary Data 3: Probes and genomic locations for 450K methylation array shown in Supplementary Figure 8c.
IlmnID	Name	AddressA_ID	AlleleA_ProbeSeq	AddressB_ID	AlleleB_ProbeSeq	Infinium_Design_Type	Next_Base	Color_Channel	Forward_Sequence	Genome_Build	CHR	MAPINFO	SourceSeq	Chromosome_36	Coordinate_36	Strand	Probe_SNPs	Probe_SNPs_10	Random_Loci	Methyl27_Loci	UCSC_RefGene_Name	UCSC_RefGene_Accession	UCSC_RefGene_Group	UCSC_CpG_Islands_Name	Relation_to_UCSC_CpG_Island	Phantom	DMR	Enhancer	HMM_Island	Regulatory_Feature_Name	Regulatory_Feature_Group	DHS
cg20092736	cg20092736	27660338	TTTTAAAAATAAAACCCACTTCTACCTCCATCAACCATATACCCTCAACA	18773483	TTTTAAAAATAAAACCCGCTTCTACCTCCGTCAACCATATACCCTCAACG	I	A	Red	GGCTGGTAGACATGATGCTCATTACCGCCTTCCACAGAGGGAAACTGAGGCACGGTGACT[CG]CTGAGGGCACATGGCTGACGGAGGCAGAAGCGGGTCTCATCTTCAAAACAGAGCTCCTCC	37	11	67982703	CGCTGAGGGCACATGGCTGACGGAGGCAGAAGCGGGTCTCATCTTCAAAA	11	67739279	F								chr11:67980011-67982068	S_Shore				11:67739054-67739312	11:67982239-67982900	Unclassified_Cell_type_specific
cg13699479	cg13699479	17612306	ATAAACRACCACCCAACACAAAAACTAAACTAAATCCAAATAACACTAAC			II			GAATCGAGGCTGTGGACGACCACCCAACACAAGAACTGGACTAAGTCCAAGTAACACTGA[CG]CACAGCGCCTCCCTCGTTTGCCCTCATTCTCGACCTTGACTTTGGCTGGTAGACATGATG	37	11	67982598	TGGACGACCACCCAACACAAGAACTGGACTAAGTCCAAGTAACACTGACG	11	67739174	R		rs34318298						chr11:67980011-67982068	S_Shore				11:67739054-67739312	11:67982239-67982900	Unclassified_Cell_type_specific
cg11117460	cg11117460	39793331	ATTACTTAAACTTAATCCAATTCTTATATTAAATAATCRTCCACAACCTC			II			GCCTGCCTTAGTTTTCCCCTGCGGCTCCAGGGCCATCATCCTCCACAAAGGATGATGAAT[CG]AGGCTGTGGACGACCACCCAACACAAGAACTGGACTAAGTCCAAGTAACACTGACGCACA	37	11	67982542	CGAGGCTGTGGACGACCACCCAACACAAGAACTGGACTAAGTCCAAGTAA	11	67739118	F								chr11:67980011-67982068	S_Shore				11:67739054-67739312	11:67982239-67982900	Unclassified_Cell_type_specific
cg01225565	cg01225565	32669476	ACTAAAAAAAAACTCTAACTCAAACCCTAACTAATTATCATAAAAATCAC			II			GGAGGTGGGGGCCATGTGGGTGCCACTTTACACCTAGGGAAACTGAGGCACAGGGAGTTC[CG]TGACCTCTATGACAACTAGTCAGGGCTTGAGCCAGAGCCCTCTTTCAGCATTCGGGTGAA	37	11	67982143	CTGAAAGAGGGCTCTGGCTCAAGCCCTGACTAGTTGTCATAGAGGTCACG	11	67738719	F	rs35105112				SUV420H1;SUV420H1	NM_017635;NM_016028	TSS1500;TSS1500	chr11:67980011-67982068	S_Shore				11:67737342-67738946
cg14814999	cg14814999	55783438	RAAACTTACCTAAACATCRATCTTATAATCCAAACAACAAAACRATAAAC			II			CGGGGAGCTGCGAAGCTTGCCTGGGCATCGATCTTGTAGTCCAGACAACAGAACGATGAG[CG]CGCTCCCGGCCCCTGCGGGGCTGCCCAGGGTCTCCGCGCATCCTCCCTCTCACGCGTCAG	37	11	67982011	AAGCTTGCCTGGGCATCGATCTTGTAGTCCAGACAACAGAACGATGAGCG	11	67738587	R					SUV420H1;SUV420H1	NM_017635;NM_016028	TSS1500;TSS1500	chr11:67980011-67982068	Island				11:67737342-67738946
cg14834466	cg14834466	53796439	RATCTTAAAATACATCTACTACCAATAACCCCCATTCCCACAACAAAAAC			II			CCCCCCCCCTCCCGCCGCGCGTCCCAGTTGCTCCGAGGGAGGTGGCCCCGGGCAGACGAG[CG]TTTTTGTTGTGGGAATGGGGGTCACTGGCAGCAGATGCACCCTAAGACCGTGTGGGCAGG	37	11	67981677	GTCTTAGGGTGCATCTGCTGCCAGTGACCCCCATTCCCACAACAAAAACG	11	67738253	F	rs10896304				SUV420H1;SUV420H1	NM_017635;NM_016028	TSS1500;TSS1500	chr11:67980011-67982068	Island				11:67737342-67738946	11:67981218-67981851	Promoter_Associated
cg02769172	cg02769172	25630388	ACAACAAAACAACAAAACAATAAAATAAAAACACCCAAAAACCAAAAACA	63611303	ACGACAAAACAACGAAACGATAAAATAAAAACGCCCGAAAACCGAAAACG	I	A	Red	TACGAAAACCGTCCGCCGGCTTCAGGACTCCGCGTCCCAGGTCCGTGCGCCGCGCGGTGC[CG]CCTCCGGTTCCCGGGCGTCCTCACCTCATCGCCCCGCTGCCCTGCCGCCCGCACCGCCGC	37	11	67981027	GCGGCAGGGCAGCGGGGCGATGAGGTGAGGACGCCCGGGAACCGGAGGCG	11	67737603	F					SUV420H1;SUV420H1	NM_017635;NM_016028	TSS1500;TSS1500	chr11:67980011-67982068	Island	high-CpG:67737195-67737836			11:67737342-67738946
cg08572966	cg08572966	41713435	AACCAATTAAAAACAAAAAACTCAAACACTACAAAAACTCATTTTTCCCA	13662347	GACCGATTAAAAACGAAAAACTCGAACGCTACGAAAACTCATTTTTCCCG	I	T	Red	ATGGAGAGTAAAATCCAAGATGGCGGCGCGGGCCGCAGCACCGCTCGCTCCCTCCGCTGA[CG]GGAAAAATGAGTCCCCGCAGCGTCCGAGCCCCCCGCCCCCAACCGGCCGCCGCCGCCGCC	37	11	67980803	CGGGAAAAATGAGTCCCCGCAGCGTCCGAGCCCCCCGCCCCCAACCGGCC	11	67737379	F					SUV420H1;SUV420H1	NM_017635;NM_016028	TSS200;TSS200	chr11:67980011-67982068	Island	high-CpG:67737195-67737836			11:67737342-67738946
cg26812728	cg26812728	36653339	TTAAAAACAAAAAACTCAAACACTACAAAAACTCATTTTTCCCATCAACA	71639397	TTAAAAACGAAAAACTCGAACGCTACGAAAACTCATTTTTCCCGTCAACG	I	A	Red	AGAAAAATGGAGAGTAAAATCCAAGATGGCGGCGCGGGCCGCAGCACCGCTCGCTCCCTC[CG]CTGACGGGAAAAATGAGTCCCCGCAGCGTCCGAGCCCCCCGCCCCCAACCGGCCGCCGCC	37	11	67980797	TTGGGGGCGGGGGGCTCGGACGCTGCGGGGACTCATTTTTCCCGTCAGCG	11	67737373	F					SUV420H1;SUV420H1	NM_017635;NM_016028	TSS200;TSS200	chr11:67980011-67982068	Island	high-CpG:67737195-67737836			11:67737342-67738946
cg01320969	cg01320969	52759476	AAAAACTCAAACACTACAAAAACTCATTTTTCCCATCAACAAAAAAAACA	24715441	AAAAACTCGAACGCTACGAAAACTCATTTTTCCCGTCAACGAAAAAAACG	I	A	Red	TAATTCCAGAGAAAAATGGAGAGTAAAATCCAAGATGGCGGCGCGGGCCGCAGCACCGCT[CG]CTCCCTCCGCTGACGGGAAAAATGAGTCCCCGCAGCGTCCGAGCCCCCCGCCCCCAACCG	37	11	67980788	CGCTCCCTCCGCTGACGGGAAAAATGAGTCCCCGCAGCGTCCGAGCCCCC	11	67737364	F					SUV420H1;SUV420H1	NM_017635;NM_016028	TSS200;TSS200	chr11:67980011-67982068	Island	high-CpG:67737195-67737836			11:67737342-67738946
cg07448771	cg07448771	21701409	ACTACAAAAACTCATTTTTCCCATCAACAAAAAAAACAAACAATACTACA	60691499	GCTACGAAAACTCATTTTTCCCGTCAACGAAAAAAACGAACGATACTACG	I	A	Red	AATCACCAAAAATAATTCCAGAGAAAAATGGAGAGTAAAATCCAAGATGGCGGCGCGGGC[CG]CAGCACCGCTCGCTCCCTCCGCTGACGGGAAAAATGAGTCCCCGCAGCGTCCGAGCCCCC	37	11	67980776	GCTGCGGGGACTCATTTTTCCCGTCAGCGGAGGGAGCGAGCGGTGCTGCG	11	67737352	F					SUV420H1;SUV420H1;SUV420H1;SUV420H1	NM_017635;NM_016028;NM_017635;NM_016028	5'UTR;5'UTR;1stExon;1stExon	chr11:67980011-67982068	Island	high-CpG:67737195-67737836			11:67737342-67738946
cg07246206	cg07246206	36718416	CCAACAAAAATATACAAAAAACAACCTCAATAACAAAACAAACAAAAACA	59623315	CCGACGAAAATATACGAAAAACGACCTCGATAACGAAACGAACAAAAACG	I	T	Red	CCCGGCCCCACCCGCCCTGGCCCCGGAGCCCTGCGACCGGCCTGGGCCCGCGGTCCCCCA[CG]TCCCTGCCCGCCCCGTCACCGAGGCCGCCCCCCGCACACCCTCGCCGGCGCCCGCCCCTC	37	11	67980532	CCGGCGAGGGTGTGCGGGGGGCGGCCTCGGTGACGGGGCGGGCAGGGACG	11	67737108	F					SUV420H1;SUV420H1	NM_017635;NM_016028	5'UTR;5'UTR	chr11:67980011-67982068	Island				11:67736588-67737269	11:67978656-67980724	Promoter_Associated
cg12365681	cg12365681	51626400	RCRATTAAAAAACTCTATTTTCCCTTTTCTCCAATAAACAACCRTAAACC			II			CGCTCGGGCCAAAACAAAAACAAAAAGTTCAGCGCGGCAGTGGGAGCAGATTGGGCGAGA[CG]GTTCACGGCTGCCCATTGGAGAAAAGGGAAAACAGAGTCCCCCAATCGCGAGCGGCGGGG	37	11	67980256	CGGTTCACGGCTGCCCATTGGAGAAAAGGGAAAACAGAGTCCCCCAATCG	11	67736832	F		rs72928496			SUV420H1;SUV420H1	NM_017635;NM_016028	5'UTR;5'UTR	chr11:67980011-67982068	Island				11:67736588-67737269	11:67978656-67980724	Promoter_Associated
cg11287039	cg11287039	43764478	AAAAAAAATAAACTACAAAACAAACTCAAAAAAACTCCAAAATACACTCA	54611341	AAAAAAAATAAACTACAAAACGAACTCGAAAAAACTCCGAAATACGCTCG	I	A	Red	GGCGCCGTCGGGGAGGAGGGTGGGCTGCAGGACGAGCTCGGGAGGGCTCCGAAATGCGCT[CG]GGCCAAAACAAAAACAAAAAGTTCAGCGCGGCAGTGGGAGCAGATTGGGCGAGACGGTTC	37	11	67980200	GAGGAGGGTGGGCTGCAGGACGAGCTCGGGAGGGCTCCGAAATGCGCTCG	11	67736776	R					SUV420H1;SUV420H1	NM_017635;NM_016028	5'UTR;5'UTR	chr11:67980011-67982068	Island				11:67736588-67737269	11:67978656-67980724	Promoter_Associated
cg21219327	cg21219327	73747384	TCTTAATCCAACAAATTACATCRAATTATCATTATTCCTCCTTCCAAAAC			II			ACTTGTTTCTATCTTAATCCAGCAAGTTGCATCGAGTTGTCATTGTTCCTCCTTCCAAGG[CG]GAGGTGACAACGGTGCACATCATCCGCGAATACGTGGAAGGACAGACACACACCAGGGGA	37	11	67980012	CGCCTTGGAAGGAGGAACAATGACAACTCGATGCAACTTGCTGGATTAAG	11	67736588	R					SUV420H1;SUV420H1	NM_017635;NM_016028	5'UTR;5'UTR	chr11:67980011-67982068	Island				11:67736588-67737269	11:67978656-67980724	Promoter_Associated
cg17166288	cg17166288	66796341	CTTAAAACRCCTTATATTCCCAAATTAAAATCCACAAACRCTCTAATCCC			II			CAGAATGTCGAATGTTTAGAGATTACAAAGTGAAAAATGGGCTGGAGTTCCCACACAAGC[CG]GGATTAGAGCGTTTGTGGACTCTAACCTGGGAATATAAGGCGCTCCAAGAGGGACAGGGC	37	11	67979344	TTGGAGCGCCTTATATTCCCAGGTTAGAGTCCACAAACGCTCTAATCCCG	11	67735920	F					SUV420H1;SUV420H1	NM_017635;NM_016028	5'UTR;5'UTR	chr11:67980011-67982068	N_Shore				11:67735641-67735963	11:67978656-67980724	Promoter_Associated
cg20100049	cg20100049	39646333	CACCAAAAAACAACATTCTCACRAAACCTTTCTAAAAAACAAAAATATAC			II			TGTGAAGGTTTCACCAGGAAGCAACATTCTCACGGGGCCTTTCTGAAGGACAAGAGTGTA[CG]GGGTGGAGAAAAGGGGTGGAGGAATGCCGGGCAGGGCACGGCCGACAGGGACCAGGTATG	37	11	67979188	ACCAGGAAGCAACATTCTCACGGGGCCTTTCTGAAGGACAAGAGTGTACG	11	67735764	R					SUV420H1;SUV420H1	NM_017635;NM_016028	5'UTR;5'UTR	chr11:67980011-67982068	N_Shore				11:67735641-67735963	11:67978656-67980724	Promoter_Associated
cg18474180	cg18474180	52631459	ACCCCAACRACTATATATATAAAAATTTCACCAAAAAACAACATTCTCAC			II			CACGAGTAACCACCCCAACGGCTGTGTGTGTGAAGGTTTCACCAGGAAGCAACATTCTCA[CG]GGGCCTTTCTGAAGGACAAGAGTGTACGGGGTGGAGAAAAGGGGTGGAGGAATGCCGGGC	37	11	67979160	CCCCAACGGCTGTGTGTGTGAAGGTTTCACCAGGAAGCAACATTCTCACG	11	67735736	R					SUV420H1;SUV420H1	NM_017635;NM_016028	5'UTR;5'UTR	chr11:67980011-67982068	N_Shore				11:67735641-67735963	11:67978656-67980724	Promoter_Associated
cg23796243	cg23796243	10699392	AAAAAAATCACCAACATCCCCCACCCACTAAATTCTCTACTAAAAAACAC			II			AATAACCCAAGAGAAAAATCACCAACATCCCCCACCCACTAAATTCTCTGCTGAAAGACA[CG]CAGACACCGGGACACTTCCTTCACACGCGTCTCTCCCTGTCAGAGTCCGCTACCCTCCAT	37	11	67978654	GAAAAATCACCAACATCCCCCACCCACTAAATTCTCTGCTGAAAGACACG	11	67735230	R					SUV420H1;SUV420H1	NM_017635;NM_016028	5'UTR;5'UTR	chr11:67980011-67982068	N_Shore		CDMR		11:67735230-67735280
cg14125003	cg14125003	60747448	AACTTACAAAACAAATCCTTTCAAATAAATCRCCRTAATCCCATTATTTC			II			AAGGATTTTGCCAATGGAGAGATTTGCCAATGTAAAGCTCATACATGGTACACAGAAACA[CG]AAATAATGGGACCACGGCGATTTATCTGAAAGGATTTGCTCTGTAAGCCATGGGAAGGGC	37	11	67978396	GCTTACAGAGCAAATCCTTTCAGATAAATCGCCGTGGTCCCATTATTTCG	11	67734972	F					SUV420H1;SUV420H1	NM_017635;NM_016028	5'UTR;5'UTR	chr11:67980011-67982068	N_Shore		CDMR
cg04465784	cg04465784	29631382	ACCTAATCAACACATCTCTAATAACACTCRACTTACTTCTCAAACCTTAC			II			AACAGGGTAGAAAAGTACAGACTAGGAAGCAGAATGACCCTTCACTGAATGGGCCTTTTG[CG]TAAGGCCTGAGAAGCAAGCCGAGTGCCATTAGAGATGTGCTGACCAGGCATTCCTATAAA	37	11	67976953	CCTGGTCAGCACATCTCTAATGGCACTCGGCTTGCTTCTCAGGCCTTACG	11	67733529	F					SUV420H1;SUV420H1	NM_017635;NM_016028	5'UTR;5'UTR	chr11:67980011-67982068	N_Shelf					11:67976434-67977659	Promoter_Associated	TRUE
cg18158888	cg18158888	32764481	AATATCRCRCTTCTCACCTTAATAACATCRTATTATAATTAAAAATTTCC			II			AATAAGAAATGTATTTAAAGGGGAAAAGATTTCAAGAATGATTTCCAGTTGTATTTAAAG[CG]GAAACTCCTAATCATAACACGATGCCACTAAGGTGAGAAGCGCGACACCCACCACCACCA	37	11	67968596	CGGAAACTCCTAATCATAACACGATGCCACTAAGGTGAGAAGCGCGACAC	11	67725172	F					SUV420H1;SUV420H1	NM_017635;NM_016028	5'UTR;5'UTR					TRUE
cg17186428	cg17186428	13755413	TTCCAAAAATCATTATAAATTACAAACATCCCCCACTATTCAAATCAATC			II			ACTGAGAAGCTACTGTATTCGGTAATGTAAATGTATCTCTTACTATCTGAATTTGGGAAC[CG]ATTGATCTGAATAGTGGGGGATGCTTGTAATTTATAATGACCTTTGGAAATGAGGATATT	37	11	67960413	TCCAAAGGTCATTATAAATTACAAGCATCCCCCACTATTCAGATCAATCG	11	67716989	F					SUV420H1;SUV420H1	NM_017635;NM_016028	5'UTR;5'UTR					TRUE
cg27086672	cg27086672	55758509	AACTAAACTTCATAAAATTCCTTTTAATACTTAAAATCTAAAATTCTAAC			II			CATTACAGATAGGACTCGACTGAAAAGGAAAGAGGAACACAAGATAGTTTCTGCAAGAAG[CG]CCAGAACTCCAGATCTCAAGTATCAAAAGGAATCTCATGAAGTTCAGCTTCCTGCTTTAG	37	11	67953814	CGCCAGAACTCCAGATCTCAAGTATCAAAAGGAATCTCATGAAGTTCAGC	11	67710390	F					SUV420H1;SUV420H1	NM_017635;NM_016028	Body;Body					TRUE
ch.11.1405170R	ch.11.1405170R	61663392	AAAAAACAAAAACATATTTTTACCTAAATTACTTCTTTTAAATTTAAACT			II			CCCCCTTTTAATTTTATCCCTTGCTAGAATTAAGATACTATATGCCTCACTTATCAATTA[CA]GTCTAAATCCAAAAGAAGTAATTCAGGTAAAAATATGCTTTTGTTTTTTTCATAAATTTT	36	11	67951916	CAGTCTAAATCCAAAAGAAGTAATTCAGGTAAAAATATGCTTTTGTTTTT	11	67708491	F					SUV420H1;SUV420H1	NM_017635;NM_016028	Body;Body
cg20252769	cg20252769	10655426	ATATAAAAACACACATAAACAAAACACTCTAATAAAAAATAAACAAACCA	25600426	ATATAAAAACACACGTAAACGAAACACTCTAATAAAAAATAAACAAACCG	I	T	Red	GTGTACACAAGAGTGTAAAAGCACACGTAAACGGAACACTCTGGTGGGAAGTAGGCAGGC[CG]TCCCCTGCACTCCCACACCGGCCTGAAGTGCTGGCATTGCTAGGAACCCAGGCTGCTCTA	37	11	67949358	CGGCCTGCCTACTTCCCACCAGAGTGTTCCGTTTACGTGTGCTTTTACAC	11	67705934	R					SUV420H1;SUV420H1	NM_017635;NM_016028	Body;Body					TRUE
cg10082963	cg10082963	24750355	TACTACTAAAAATCAAAATCCAAACATAACCCRTATAACATAAAAACAAC			II			TTGACTAACTCTTGTTGTTCACTCTGGACATTAACGAAAAAGACTGGAATAGGGCTACAG[CG]CTGCTTTTATGCTACACGGGTTATGCTTGGACTCTGACTCCCAGCAGCAGGTAGATTCAG	37	11	67933294	CGCTGCTTTTATGCTACACGGGTTATGCTTGGACTCTGACTCCCAGCAGC	11	67689870	F					SUV420H1;SUV420H1	NM_017635;NM_016028	Body;3'UTR
cg25321114	cg25321114	15665390	CAAAAAAACCAACCCAAACCRCAATTACCAACRAATACTTAACTAAACAC			II			GCGAGCTCTCCCCCTGCGAATGAGCACCTCTCACAGGATTCTGTCTGTGTTCTCTCGCCG[CG]TGTCTAGTCAAGCACCCGCTGGCAACTGCGGCTTGGGCTGGTCCCTCTGGCTCCTTATCT	37	11	67926276	AGAGGGACCAGCCCAAGCCGCAGTTGCCAGCGGGTGCTTGACTAGACACG	11	67682852	F					SUV420H1	NM_017635	Body						11:67682669-67682883
cg24056954	cg24056954	48651456	TCAAATTTATTCTTATCCTCACTAACCRCCRAATTATATAAATACAAAAC			II			AGAGGCCTCCTTCAGATTTGTTCTTGTCCTCACTGACCGCCGAGTTATGTAGGTGCAGGG[CG]AGCTCTCCCCCTGCGAATGAGCACCTCTCACAGGATTCTGTCTGTGTTCTCTCGCCGCGT	37	11	67926217	CGCCCTGCACCTACATAACTCGGCGGTCAGTGAGGACAAGAACAAATCTG	11	67682793	R					SUV420H1	NM_017635	Body						11:67682669-67682883
cg11634248	cg11634248	64634413	ACAAAAACAAATCTAAAAAAAACCTCTAACATCAAACTTAAACCAAATAC			II			CTGCAGCTGTTCACCACTGTCGGGGCAAGGTTCCGTCACACTGCTTTTATAGCCATTCAA[CG]TATTTGGTTCAAGCTTGATGTCAGAGGCCTCCTTCAGATTTGTTCTTGTCCTCACTGACC	37	11	67926133	CAAGAACAAATCTGAAGGAGGCCTCTGACATCAAGCTTGAACCAAATACG	11	67682709	F	rs3824853				SUV420H1	NM_017635	Body						11:67682669-67682883
cg08668878	cg08668878	57642437	ATACAACATACTAACTCAATTCTTAAATCTAATTTATACAAATTTTTATC			II			TTTACAACAGGGCTTTACCTCTAACTCAGAATTGCACGTAAGAAGGCTATTTAAAAAGTA[CG]ATAAAAATTTGCACAAATCAGACTTAAGAATTGAGTCAGTATGCTGTACACTTTCTACAA	37	11	67924970	TACAGCATACTGACTCAATTCTTAAGTCTGATTTGTGCAAATTTTTATCG	11	67681546	F					SUV420H1	NM_017635	3'UTR
